1 **Dual functionality of the TasA amyloid protein in *Bacillus* physiology and**  
2 **fitness on the phylloplane**

3 Jesús Cámara-Almirón<sup>1,#</sup>, Yurena Navarro<sup>1,#</sup>, M. Concepción Magno-Pérez-Bryan<sup>1</sup>,  
4 Carlos Molina-Santiago<sup>1</sup>, John R. Pearson<sup>2</sup>, Luis Díaz-Martínez<sup>1</sup>, Antonio de Vicente<sup>1</sup>,  
5 Alejandro Pérez-García<sup>1</sup> and Diego Romero<sup>1,\*</sup>

6 <sup>1</sup>Instituto de Hortofruticultura Subtropical y Mediterránea “La Mayora” – Departamento  
7 de Microbiología, Universidad de Málaga, Bulevar Louis Pasteur 31 (Campus  
8 Universitario de Teatinos), 29071 Málaga, Spain

9 <sup>2</sup>Nano-imaging Unit, Andalusian Centre for Nanomedicine and Biotechnology,  
10 BIONAND, Málaga, Spain

11

12 # These authors contributed equally to this work

13

14 \* **Corresponding author:**

15 diego\_romero@uma.es

16 Phone: +34951953057

17 Fax: +34952136645

18

19 **Abstract**

20

21 Bacteria can form biofilms that consist of multicellular communities embedded in an  
22 extracellular matrix (ECM). Previous studies have demonstrated that genetic pathways  
23 involved in biofilm formation are activated under a variety of environmental conditions  
24 to enhance bacterial fitness; however, the functions of the individual ECM components  
25 are still poorly understood. In *Bacillus subtilis*, the main protein component of the ECM  
26 is the functional amyloid TasA. In this study, we demonstrate that beyond their well-  
27 known defect in biofilm formation,  $\Delta$ *tasA* cells also exhibit a range of cytological  
28 symptoms indicative of excessive cellular stress, including DNA damage accumulation,  
29 changes in membrane potential, higher susceptibility to oxidative stress, and  
30 alterations in membrane dynamics. Collectively, these events can lead to increased  
31 programmed cell death in the colony. We show that these major physiological changes  
32 in  $\Delta$ *tasA* cells are likely independent of the structural role of TasA during amyloid fiber  
33 formation in the ECM. The presence of TasA in cellular membranes, which would place  
34 it in proximity to functional membrane microdomains, and mislocalization of the flotillin-  
35 like protein FloT in  $\Delta$ *tasA* cells, led us to propose a role for TasA in the stabilization of  
36 membrane dynamics as cells enter stationary phase. We found that these alterations  
37 caused by the absence of TasA impair the survival, colonization and competition of  
38 *Bacillus* cells on the phylloplane. Taken together, our results allow the separation of  
39 two complementary roles of this functional amyloid protein: i) structural functions during  
40 ECM assembly and interactions with plants, and ii) a physiological function in which  
41 TasA, via its localization to the cell membrane, stabilizes membrane dynamics and  
42 supports more effective cellular adaptation to environmental cues.

43

44

## 45 Introduction

46

47 In response to a wide range of environmental factors<sup>1,2</sup>, some bacterial species  
48 establish complex communities called biofilms<sup>3</sup>. To do so, planktonic cells initiate a  
49 transition into a sedentary lifestyle and trigger a cell differentiation program that leads  
50 to two distinctive features: (1) a division of labor, in which different subpopulations of  
51 cells are dedicated to covering different processes needed to maintain the viability of  
52 the community<sup>4,5</sup>, and (2) the secretion of a battery of molecules that assemble the  
53 extracellular matrix (ECM)<sup>3,6</sup>. Like in eukaryotic tissues, the bacterial ECM is a dynamic  
54 structure that supports cellular adhesion and regulates the flux of signals to ensure cell  
55 differentiation, both of which are key ECM functions in biofilms<sup>7,8</sup>. The tissue-like  
56 structure of biofilms also provides stability and serves as an interface with the external  
57 environment, working as a formidable physicochemical barrier against external  
58 assaults<sup>9-11</sup>. In eukaryotic cells, the ECM plays an important role in signaling<sup>12,13</sup> and  
59 has been described as a reservoir for the localization and concentration of growth  
60 factors, which in turn form gradients that are critical for the establishment of  
61 developmental patterning during morphogenesis<sup>14,15,16</sup>. Interestingly, in senescent cells,  
62 partial loss of the ECM as well as rearrangement of its components via an interplay  
63 between the activities of various matrix metalloproteases (MMPs) and tissue-specific  
64 MMP inhibitors can influence cell fate, e.g., by activating the apoptotic program<sup>17,18</sup>. In  
65 both eukaryotes and prokaryotes, senescence involves global changes in cellular  
66 physiology, and in some microbes, this process begins with the entry of the cells into  
67 stationary phase<sup>19-21</sup>. At this stage, the rate of cell division slows<sup>21</sup>, the molecular  
68 machinery adapts to increase cellular resistance and the respiration and primary  
69 metabolism shift to fermentative pathways and to the production of secondary  
70 metabolites, respectively<sup>22</sup>. This process triggers a response typified by molecular  
71 mechanisms evolved to overcome environmental adversities and to ensure survival,  
72 including the activation of general stress response genes<sup>23,24</sup>, a shift to anaerobic  
73 respiration<sup>22</sup>, enhanced DNA repair<sup>25</sup>, and induction of pathways for the metabolism of  
74 alternative nutrient sources or sub-products of primary metabolism<sup>26</sup>.

75

76 Studies of *Bacillus subtilis* biofilms have contributed to our understanding of the  
77 intricate developmental program that underlies biofilm formation<sup>27-30</sup>. External receptors  
78 oversee the sensing of a myriad of signals that must be properly integrated via an  
79 interconnected network of genetic cascades that end with the expression and secretion  
80 of ECM components accompanied by other cellular changes. Currently, the *B. subtilis*  
81 ECM is known to consist mainly of exopolysaccharide (EPS) and the TasA and BslA

82 proteins<sup>27</sup>. Mutations affecting any of these components lead to different morphological  
83 phenotypes, reflecting their complementary functions in establishing the final  
84 architecture of the biofilm. The EPS acts as the adhesive element of the biofilm cells at  
85 the cell-to-surface interface, which is important for biofilm attachment<sup>31</sup>, and BsIA is a  
86 hydrophobin that forms a thin external hydrophobic layer and is the main factor that  
87 confers hydrophobic properties to biofilms<sup>32</sup>. Both structural factors contribute to  
88 maintain the defense function performed by the ECM<sup>11,32</sup>. TasA is a functional amyloid  
89 protein that forms resistant fibers that confer structural stability to biofilms<sup>33,34</sup>.  
90 Additional proteins are needed for the polymerization of these fibers: TapA appears to  
91 favor the transition of TasA into the fiber state, and the signal peptidase SipW  
92 processes both proteins into their mature forms<sup>35,36</sup>. Amyloids are widespread in  
93 nature, and studies in various experimental systems are expanding our view of the  
94 functions of this heterogeneous family of proteins. The ability of amyloids to transition  
95 from monomers into fibers represents structural, biochemical and functional versatility  
96 that microbes exploit in different contexts and for different purposes, e.g., the formation  
97 of adhesins and other ECM components, virulence expression, and competition with  
98 other organisms<sup>37</sup>.

99

100 Previous studies have demonstrated that the genetic pathways involved in biofilm  
101 formation are active during the interaction of several microbial species with plants<sup>38,39</sup>.  
102 In *B. subtilis*, the lipopeptide surfactin acts as a self-trigger of biofilm formation on the  
103 melon phylloplane, which is connected with the suppressive activity of *B. subtilis*  
104 against phytopathogenic fungi<sup>40</sup>. These findings led us to hypothesize that the ECM  
105 makes a major contribution to the ecology of *B. subtilis* in the poorly explored  
106 phyllosphere. Our study of the ecology of *B. subtilis* NCIB3610-derived strains carrying  
107 single mutations in different ECM components in the phyllosphere highlights the role of  
108 TasA in bacteria-plant interactions. Moreover, the increased production of secondary  
109 metabolites by a *tasA* mutant strain on plant leaves revealed a complementary role for  
110 TasA in the stabilization of the bacteria's physiology. In  $\Delta$ *tasA* cells, gene expression  
111 changes and dynamic cytological alterations affect membrane potential, adaptation to  
112 oxidative stress and membrane functionality and dynamics, which eventually lead to a  
113 premature increase in programmed cell death (PCD) within the colony. In addition, two  
114 complementary pieces of evidence prove that these alterations are independent of the  
115 structural role of TasA in ECM assembly: i) we report that TasA is associated with the  
116 detergent-resistant fraction of the cell membrane (DRM) and that its absence leads to  
117 changes in membrane dynamics, as indicated by the mislocalization of the flotillin-like  
118 protein FloT, which is involved in the regulation of many of these physiological



119 functions; and ii) ectopic expression of a mutated TasA protein in a *tasA* null mutant  
120 background fails to restore the strain's ability to form biofilms and antagonize a  
121 phytopathogenic fungus on plants, while it does restore the mutant strain's ability to  
122 maintain the physiological status of the cells. All these results indicate that these two  
123 complementary roles of TasA, both as part of the ECM and in regulating cell  
124 membrane dynamics, are important to preserve cell viability within the colony and for  
125 the ecological fitness of *B. subtilis* in the phylloplane.  
126

127 **Results**

128

129 **TasA contributes to the fitness of *Bacillus* on the phylloplane**

130

131 Surfactin, a member of a subfamily of lipopeptides produced by *B. subtilis* and related  
132 species, contributes to the multicellularity of biofilms by triggering a potassium leakage  
133 that is detected by the sensor kinase KinC, which ultimately activates the expression of  
134 the *eps* and *tapA* operons required for biofilm formation<sup>41</sup>. Reflecting the contribution  
135 made by surfactin to multicellularity, we previously reported how a mutant strain  
136 defective for lipopeptide production showed impaired biofilm assembly on the  
137 phylloplane<sup>40</sup>. These two observations led us to evaluate the specific contributions  
138 made by the ECM structural components TasA and the EPS to *B. subtilis* fitness on  
139 melon leaves. Although not directly linked to the surfactin-activated regulatory pathway,  
140 we also studied the gene encoding the hydrophobin protein BslA (another important  
141 ECM component). A *tasA* mutant strain ( $\Delta$ *tasA*) is defective in the initial cell attachment  
142 to plant surfaces (4 hours and two days post-inoculation) (Fig. 1A, top and Fig. S1A).  
143 As expected, based on their structural functions, all of the matrix mutants showed  
144 reduced survival; however, the population of  $\Delta$ *tasA* cells continuously and steadily  
145 decreased over time compared to the populations of *eps* or *bslA* mutant cells (Fig. 1B  
146 and Fig. S1B). Examination of plants inoculated with the wild type strain (WT) or with  
147 the  $\Delta$ *tasA* strain via scanning electron microscopy (SEM) revealed variability in the  
148 colonization patterns of the strains. WT cells assembled in ordered and compact  
149 colonies, with the cells embedded in a network of extracellular material (Fig. 1C, top).  
150 In contrast, the  $\Delta$ *tasA* cells were prone to irregular distribution as large masses of cells  
151 on the leaves (Fig. 1C, bottom). Finally, *eps* and *bslA* mutant cells formed flat colonies  
152 (Fig. S2A) with the same colonization defects observed in the *tasA* mutant cells (Fig.  
153 S1C).

154

155 Based on the reduced fitness exhibited by the single ECM component mutant strains  
156 and their deficiencies in biofilm formation, we hypothesized that these strains may also  
157 be defective in their antagonistic interactions with *Podosphaera xanthi* (an important  
158 fungal biotrophic phytopathogen of crops<sup>42</sup>) on plant leaves. Strains with mutations in  
159 *eps* and *bslA* partially ameliorated the disease symptoms, although their phenotypes  
160 were not significantly different from those of the WT strain (Fig. S1D). However,  
161 contrary to our expectations, the  $\Delta$ *tasA* strain retained similar antagonistic activity to  
162 that of the WT strain (Fig. 1D). The simplest explanation for this finding is that the  
163 antifungal activity exhibited by the  $\Delta$ *tasA* cells is due to higher production of antifungal

164 compounds. *In situ* mass spectrometry analysis revealed a consistently higher relative  
165 amount of the antifungal compound plipastatin (also known as fengycin, the primary  
166 antifungal compound produced by *B. subtilis*) on leaves treated with  $\Delta$ *tasA* cells  
167 compared to those treated with WT cells (Fig. 1E). These observations argue in favor  
168 of the relevance of the ECM and specifically TasA in the colonization and survival of *B.*  
169 *subtilis* on the phylloplane and revealed the importance of this ECM structural  
170 component in the antagonistic activity of *Bacillus* on the phylloplane.

171

## 172 **Loss of TasA causes a global change in the physiological state of the bacterial** 173 **cells**

174

175 The increased fengycin production and the previously reported deregulation of the  
176 expression pattern of the *tapA* operon in a  $\Delta$ *tasA* mutant strain<sup>9</sup> led us to explore  
177 whether loss of *tasA* disrupts the genetic circuitry of the cells. We sequenced and  
178 analyzed the whole transcriptomes of  $\Delta$ *tasA* and WT cells grown *in vitro* on MSgg agar  
179 plates, a chemically-defined medium specifically formulated to support biofilm  
180 formation. Total RNA was extracted from colonies grown for 72 h, a time-point at which  
181 the phenotypic differences were clearly visible (Fig. S2A). RNA-seq analysis (suppl.  
182 Tables 1 and 2) showed that deletion of *tasA* resulted in pleiotropic effects on the  
183 overall gene expression profile of this mutant (Fig. 2A, Fig. S3A), with more than 800  
184 differentially expressed genes (299 induced and 520 repressed), and these gene  
185 expression changes could hypothetically be responsible for substantial physiological  
186 changes (Fig. S4). A closer look at the data allowed us to cluster the differentially  
187 expressed genes into well-known regulons (Fig. 2A). The *sigKN*, *sigG*, *gerR* and *gerE*  
188 regulators, which control the expression of genes related to sporulation, were  
189 repressed in the  $\Delta$ *tasA* cells, consistent with the delayed sporulation defect previously  
190 reported in ECM mutants<sup>9,30</sup> (Fig. S5). In contrast, the expression levels of biofilm-  
191 related genes, including the *epsA-O*, and *tapA* operons, were higher in the  $\Delta$ *tasA* cells  
192 compared to their expression levels in WT cells. We found higher expression of the  
193 *slrR* transcriptional regulator (Suppl. table 1), which could explain the induction of the  
194 ECM-related genes<sup>27</sup>.

195

196 An in-depth analysis of the transcriptional changes in the  $\Delta$ *tasA* mutant cells  
197 highlighted the broad metabolic rearrangements that take place in  $\Delta$ *tasA* colonies,  
198 including the induction of genes implicated in energy metabolism, secondary  
199 metabolism and general stress, among other categories (Suppl. table 1 and fig. S3A).  
200 First, the *alsS* and *alsD* genes, which encode acetolactate synthase and acetolactate

201 decarboxylase, respectively, were clearly induced (Suppl. Table 1). This pathway feeds  
202 pyruvate into acetoin synthesis, a small four-carbon molecule that is produced in *B.*  
203 *subtilis* during fermentative and overflow metabolism<sup>43</sup>. Second, we observed induction  
204 of genes involved in fengycin biosynthesis (consistent with the overproduction of this  
205 antifungal lipopeptide *in planta*) (Fig. 1E), genes involved in the biosynthesis of  
206 surfactin, subtilisin, bacilysin and bacillaene (secondary metabolites with antimicrobial  
207 activities<sup>44-47</sup>) (Fig. 2B), as well as the operon encoding the iron-chelating protein  
208 bacillibactin (*dhbACEBF*) (Suppl. Table 1). All of these expression changes were  
209 confirmed via qRT-PCR analysis (Fig. S3B). Finally, the gene encoding the regulator  
210 AscR was induced. AscR controls transcription of the *snaA*  
211 (*snaAtcyJKLMNcmoOcmoJlrbfKsndAytnM*) and *yxe*  
212 (*yxeKsnaByxeMyxeNyxeOsndByxeQ*) operons (Suppl. Table 1), the products of which  
213 are members of alternative metabolic pathways that process modified versions of the  
214 amino acid cysteine. More specifically, the products of the *snaA* operon degrade  
215 alkylated forms of cysteine that are produced during normal metabolic reactions due to  
216 aging of the molecular machinery<sup>26</sup>. The *yxe* operon is implicated in the detoxification  
217 of S-(2-succino)cysteine, a toxic form of cysteine that is produced via spontaneous  
218 reactions between fumarate and cellular thiol groups in the presence of excess  
219 nutrients, which subsequently leads to increased bacterial stress<sup>48,49</sup>. All of these  
220 transcriptional changes suggest an excess of cellular stress in the  $\Delta$ *tasA* cells at 72  
221 hours. In support of this prediction, an additional sign of stress was the overexpression  
222 of the sigma factor SigB ( $\sigma^B$ ) (suppl. Table 1), which controls the transcription of genes  
223 related to the general stress response<sup>23</sup> (Fig. 2C), those encoding antibiotic resistance  
224 proteins and multidrug transporters (*ybbF* and *yvmA*), and proteins that confer  
225 resistance to other stressors, such as ethanol (*ydaD*, *yhxD*, *yceG*) or peroxide radicals  
226 (*ahpC* and *ahpF*) (Suppl. Table 1 and Fig. S3D). Interestingly, and also related to  
227 bacterial cell stress, we observed that nearly 67% of the genes belonging to the  
228 lysogenic bacteriophage PBSX were induced, a feature that has been reported to  
229 occur in response to mutations as well as to DNA or peptidoglycan damage<sup>50,51</sup> (suppl.  
230 Table 1).

231

232 In general, the transcriptional changes in the  $\Delta$ *tasA* cells illustrate an intrinsic major  
233 physiological change suggesting excessive cellular stress and the early entry of the  
234 cells into stationary phase, which is supported by increased expression levels of genes  
235 related to: i) biofilm formation ii) synthesis of secondary metabolites (siderophores,  
236 antimicrobials, etc.); iii) fermentative metabolic pathways and overflow metabolism; iv)

237 paralogous metabolism and assimilation of modified or toxic metabolic intermediates;

238 v) general stress; and vi) induction of the lysogenic bacteriophage PBSX.

239

240

241 ***ΔtasA* cells exhibit low primary metabolic activity and increased secondary**  
242 **metabolism**

243

244 Our transcriptomic analysis suggested that *ΔtasA* cells exhibit a shift from aerobic  
245 respiration to fermentation and anaerobic respiration as well as activation of secondary  
246 metabolism, physiological features typical of stationary phase cells<sup>22,52</sup>. Activation of  
247 secondary metabolism provides an efficient means to utilize molecular intermediates  
248 upon growth arrest, nutrients depletion, or population stabilization. Fengycin is among  
249 the molecules produced during the later stages of bacterial growth. Based on the  
250 higher abundance of this molecule found on leaves treated with *ΔtasA* cells and its key  
251 role in the interaction between *B. subtilis* and fungal pathogens, we further investigated  
252 the kinetics of fengycin production *in vitro*. Flow cytometry analysis of cells expressing  
253 YFP under the control of the fengycin operon promoter demonstrated that fengycin  
254 production was induced in a subpopulation of cells (26.5%) at 48 h in the WT strain,  
255 reminiscent of the expression pattern reported for surfactin<sup>41</sup>. However, more than half  
256 of the *ΔtasA* population (67.3%) actively expressed YFP from the fengycin operon  
257 promoter at this time point (Fig. 3A top). At later stages of growth (72 h), the promoter  
258 was still active in the *ΔtasA* cells, and the population of positive cells was consistently  
259 higher than that in the WT strain (Fig. 3A bottom). Mass spectrometry analysis of cell-  
260 free supernatants demonstrated that this expression level was sufficient for the *tasA*  
261 mutant cells to produce nearly an order of magnitude more fengycin (Fig. 3B),  
262 consistent with our findings in plants (Fig. 1E). The fengycin levels found in the cell-free  
263 *ΔtasA* supernatant should be sufficient to provide at least the same level of antifungal  
264 activity as that extracted from the WT cells. *In vitro* experiments validated this  
265 hypothesis, showing that the cell-free supernatants from *ΔtasA* cells exhibited  
266 antifungal activity against *P. xanthii* conidia equivalent to that of WT cells, even in  
267 highly diluted spent medium (Fig. 3C). These results confirm the robust antimicrobial  
268 potency of *ΔtasA* cells and imply that primary metabolic intermediates are diverted to  
269 different pathways to support the higher secondary metabolite production in the *ΔtasA*  
270 mutant cells.

271

272 Consistent with these findings, we observed two complementary results that indicate  
273 less efficient metabolic activity in *ΔtasA* cells compared to that in WT cells. First, the  
274 *nasD* and *nasF* genes (parts of the anaerobic respiration machinery) were induced,  
275 and genes encoding several terminal oxidases found in the electron transport chain  
276 (*ythA*, *qoxB*, *cydD* and *cydB*) were differentially expressed (suppl. Table 1). The  
277 analysis of the respiration rates of these strains using the tetrazolium-derived dye 5-

278 cyano-2,3-ditoyl tetrazolium chloride (CTC) and flow cytometry revealed a higher  
279 proportion of *ΔtasA* cells with lower respiration rates at 24 and 72 h compared to the  
280 WT proportions (69.10% vs. 43.07% at 24 h and 74.56 vs. 65.11% at 72 h,  
281 respectively) (Suppl. Table 3 and Fig. 4A). Second, the expression levels of the *alsSD*  
282 genes, which are responsible for the synthesis of acetoin (a metabolite produced by  
283 fermentative pathways) were higher in the *ΔtasA* strain than in the WT strain (Suppl.  
284 Table 1 and Fig. S3C). Indeed, all of the factors required for acetoin synthesis from  
285 pyruvate were overexpressed, whereas some key factors involved in the divergent or  
286 gluconeogenic pathways were repressed (Suppl. Table 1 and Fig. S3E). Expression  
287 of *alsS* and *alsD* is induced by acetate, low pH and anaerobiosis<sup>43,53,54</sup>. Acetoin, in  
288 contrast to acetate, is a neutral metabolite produced to manage the intracellular pH and  
289 to ameliorate over-acidification caused by the accumulation of toxic concentrations of  
290 acetate or lactate, and its production is favored during bacterial growth under aerobic  
291 conditions<sup>55</sup>. Reduced respiration rates typically result in the accumulation of higher  
292 cellular proton concentrations, which leads to cytoplasmic acidification. These  
293 observations led us to postulate that the activation of the *alsSD* genes and the lower  
294 respiration rates observed in *ΔtasA* colonies might also reflect acidification of the  
295 intracellular environment, a potential cause of stationary phase-related stress.  
296 Measurements of the intracellular pH levels using the fluorescent probe 5-  
297 (6)carboxyfluorescein diacetate succinimidyl ester confirmed a significant decrease in  
298 the intracellular pH of nearly one unit ( $-0.92 \pm 0.33$ , p value = 0.016) in *ΔtasA* cells at  
299 72 h (Fig. 4B) compared to that in WT cells.

300

301 Based on these results, we conclude that the *ΔtasA* mutant presents alterations in  
302 primary and secondary metabolism, the latter of which were more robust, that lead to  
303 overproduction of secondary metabolites and over-acidification of the intracellular  
304 environment.

305

### 306 **Loss of TasA increases membrane fluidity and cell death**

307

308 The reduction in metabolic activity of *ΔtasA* cells, along with their acidification of the  
309 intracellular environment, might be expected to result in reduced bacterial viability.  
310 Measurements of the dynamics of viable bacterial cell density, expressed as CFU  
311 counts, showed that after 48 h, *ΔtasA* colonies possessed nearly an order of  
312 magnitude fewer CFUs than did WT colonies (Fig. 4C). These results suggest the  
313 hypothesis that *ΔtasA* colonies might exhibit higher rates of cell death than WT  
314 colonies. To validate this hypothesis, we analyzed the live and dead sub-populations



315 using the BacLight LIVE/DEAD viability stain and confocal microscopy (Fig. 4D left).  
316 The proportion of dead cells in  $\Delta tasA$  colonies ranged from between 16.80% ( $16.80 \pm$   
317  $1.17$ ) and 20.06% ( $20.06 \pm 0.79$ ) compared to 4.45% ( $4.45 \pm 0.67$ ) and 3.24% ( $3.24 \pm$   
318  $0.51$ ) found in WT colonies at 48 and 72 h, respectively (Fig. 4D right). The significantly  
319 higher rate of cell death in  $\Delta tasA$  compared to WT is consistent with the drastically  
320 lower bacterial counts found in the  $\Delta tasA$  mutant colonies after 48 hours.

321

322 Apoptosis or programmed cell death (PCD) is a well-established process in eukaryotic  
323 cells whose existence in prokaryotes has recently been accepted<sup>56-58</sup>. One of the  
324 instigators of PCD is the age-dependent accumulation of damaged cellular  
325 components and flaws in metabolic reactions. The accumulation of reactive oxygen  
326 species (ROS) is a well-known trigger of PCD<sup>59</sup>. To determine if  $\Delta tasA$  cells possess  
327 abnormal ROS levels, we monitored ROS generation using hydroxyphenyl fluorescein  
328 (HPF), a fluorescent indicator of the presence of highly reactive hydroxyl radicals. Flow  
329 cytometry analysis revealed a larger proportion of HPF-positive cells (which have  
330 increased ROS levels) in the  $\Delta tasA$  strain at 24 h compared to the WT proportion  
331 (42.38% vs. 28.61%, respectively) (Fig. 4A and suppl. table 3). ROS are highly  
332 reactive, unstable molecules that target different cellular components, including DNA  
333 and lipid bilayers. Indeed, DNA damage and ion gradient disruption (which translates  
334 into altered membrane potential) are two hallmarks of PCD in both prokaryotes and  
335 eukaryotes. We first searched for DNA damage by performing TUNEL assays to  
336 fluorescently stain bacterial cells containing DNA strand breaks. At 24 and 48 hours,  
337 we found a significantly higher number of fluorescently-stained  $\Delta tasA$  cells compared  
338 with the number of fluorescently-stained WT cells (shown in Fig. 5A and quantified in  
339 5B). These results indicated that DNA damage appears to occur not only earlier, but  
340 also with a higher frequency, in  $\Delta tasA$  cells than in WT cells. A sizeable number of  
341 stained cells was also found at 72 h in the  $\Delta tasA$  colonies, the same time-point at  
342 which the TUNEL signal started to increase in the WT colonies (Fig. 5A). The TUNEL  
343 signal in the  $\Delta tasA$  cells at this time-point was not significantly different from that of the  
344 WT cells (Fig. 5B), probably due to the increased cell death in the  $\Delta tasA$  cells.

345

346 Next, we assessed the cellular membrane potential using the fluorescent indicator  
347 tetramethylrhodamine, methyl ester (TMRM). Consistent with the levels of DNA  
348 damage detected via the TUNEL assays, the alterations in the membrane potential of  
349 the  $\Delta tasA$  cells were significantly different at all time points compared with the  
350 corresponding values for the WT cells (Fig. 6A left panel and 6B left). These results  
351 indicate that after 48 h (the same time point at which the cell death rate increases and



352 the cell population plateaus in *ΔtasA* colonies) *ΔtasA* cells also exhibit increased  
353 membrane hyperpolarization compared with that in the WT cells, a feature that has  
354 been linked to mitochondrial-triggered PCD in eukaryotic cells<sup>60-62</sup>.

355

356 The differences in ROS production, DNA damage level and membrane  
357 hyperpolarization between the WT and *ΔtasA* cell populations are consistent with  
358 increased PCD being the cause of the higher cell death rate observed in *ΔtasA*  
359 colonies after 24 h. To test the idea that loss of *tasA* results in increased PCD, we  
360 investigated the level of membrane lipid peroxidation, a chemical modification derived  
361 from oxidative stress that subsequently affects cell viability by inducing toxicity and  
362 apoptosis in eukaryotic cells<sup>63,64</sup>. Staining with BODIPY 581/591 C11, a fluorescent  
363 compound that is sensitive to the lipid oxidation state and localizes to the cell  
364 membrane, showed no significant detectable differences in the levels of lipid  
365 peroxidation at any time point (Fig. S11C). However, treatment with cumene  
366 hydroperoxide (CuHpx), a known inducer of lipid peroxide formation<sup>65</sup>, resulted in  
367 different responses in the two strains. WT cells showed high reduced/oxidized ratios at  
368 48 and 72 h and, thus, a low level of lipid peroxidation (Fig. 6A center panel and fig. 6B  
369 center). In contrast, the comparatively lower reduced/oxidized ratios in *ΔtasA* cells at  
370 48 and 72 h indicated increased lipid peroxidation (fig. 6A center panel and fig. 6B  
371 center). These results demonstrate that the *ΔtasA* strain is less tolerant to oxidative  
372 stress than is the WT strain, and, therefore, is more susceptible to ROS-induced  
373 damage.

374

375 Based on the higher susceptibility of the *ΔtasA* strain to lipid peroxidation and  
376 considering the differences in ROS production between the WT and *ΔtasA* cells, we  
377 next studied the integrity and functionality of the plasma membrane. First, no clear  
378 differences in the integrity, shape or thickness of the cell membrane or cell wall were  
379 observed via transmission electron microscopy (TEM) of negatively stained thin  
380 sections of embedded *ΔtasA* or WT cells at 24 and 72 h under our experimental  
381 conditions (Fig. S6). Next, we examined membrane fluidity, an important functional  
382 feature of biological membranes that affects their permeability and binding of  
383 membrane-associated proteins, by measuring the Laurdan generalized polarization  
384 (Laurdan GP)<sup>63,66</sup>. Our results show that the Laurdan GP values were significantly  
385 lower at 48 and 72 h in *ΔtasA* cells compared with the values in WT cells ( $0.65 \pm 0.03$   
386 or  $0.82 \pm 0.03$  p value = 0.0001, respectively, at 48 h, and  $0.87 \pm 0.006$  or  $0.73 \pm 0.007$   
387 p value < 0.0001, respectively, at 72 h) (Fig. 6A right panel and 6B right). These results  
388 indicate incremental changes in membrane fluidity, comparable to that resulting from

389 treatment of cells with benzyl alcohol, a known membrane fluidifier (Fig. S13A top and  
390 center panels and fig. S13B). Membrane fluidity has been associated with higher ion,  
391 small molecule and proton permeability<sup>67,68</sup>, which would explain why the  $\Delta$ *tasA* cells  
392 are impaired in energy homeostasis as well as the subsequent effects on the  
393 intracellular pH and membrane potential that eventually contribute to cell death.

394

### 395 **TasA is located in the DRM of cell membranes**

396

397 The negative effects on membrane potential and fluidity observed in the  $\Delta$ *tasA* cells  
398 suggest alterations in membrane dynamics, which in bacterial cells are directly related  
399 to functional membrane microdomains (FMM); FMMs are specialized membrane  
400 domains that also regulate important cellular functions such as KinC-dependent biofilm  
401 formation, sporulation, protein secretion, competence, motility or cell division among  
402 others<sup>69-72</sup>. The bacterial flotillins FloT and FloA are localized in FMMs and are directly  
403 involved in the regulation of membrane fluidity<sup>69</sup>. Our transcriptomic data of  $\Delta$ *tasA*  
404 colonies at 72 h revealed induction of genes that encode proteins that interact with  
405 either FloT alone or with FloT and FloA (suppl. table 4)<sup>70</sup>. These two lines of evidences  
406 led us to propose a connection between the membrane fluidity and permeability of  
407  $\Delta$ *tasA* cells and changes in the FMMs. We initially studied the membrane distribution of  
408 FloT as a marker for FMMs in WT and  $\Delta$ *tasA* cells using a FloT-YFP translational  
409 fusion construct and confocal microscopy (Fig. 7A). The WT strain showed the typical  
410 FloT distribution pattern, in which the protein is located within the bacterial membrane  
411 in the form of discrete foci<sup>73</sup> (Fig. 7A top). However, in the  $\Delta$ *tasA* cells, the fluorescent  
412 signal was visible only in a subset of the population, and it was completely mislocalized  
413 (Fig. 7A bottom). In agreement with these findings, quantification of the fluorescent  
414 signal in WT and  $\Delta$ *tasA* samples showed significant decreases in the signal in the  
415  $\Delta$ *tasA* mutant cells at 48 and 72 h (Fig. 7B).

416

417 The different FloT localization observed in the  $\Delta$ *tasA* mutant cells led us to speculate  
418 on the presence of TasA in FMMs. Membranes from both prokaryotes and eukaryotes  
419 can be separated into detergent-resistant (DRM) and detergent-sensitive fractions  
420 (DSM) based on their solubility in detergent solutions<sup>73</sup>. Although it is important to point  
421 out that the DRM and FMMs (or lipid rafts in eukaryotes) are not equivalent, the DRM  
422 fraction has a differential lipid composition and is enriched with proteins, rendering it  
423 more resistant to detergents; furthermore, many of the proteins present in FMMs are  
424 also present in the DRM<sup>74</sup>. Immunodetection assays of the DRM, DSM and cytosolic  
425 fractions of each strain using an anti-TasA antibody showed the presence of anti-TasA

426 reactive bands of the expected size primarily in the DRM fraction and in the cytosol  
427 (Fig. 7C top, lanes 1 and 3). As controls, the fractions from the *tasA* mutant showed no  
428 signal (Fig. 7C top, lanes 4, 5 and 6). Western blots of the same fractions isolated from  
429 WT and  $\Delta$ *tasA* strains carrying a FloT-YFP translational fusion with an anti-YFP  
430 antibody (Fig. 7C bottom) confirmed that FloT was mainly present in the DRM of WT  
431 cells (Fig. 7C bottom, lane 1). The signal was barely noticeable in the same fraction  
432 from  $\Delta$ *tasA* cells (Fig. 7C bottom, lane 4), mirroring the reduced fluorescence levels  
433 observed via microscopy (Fig. 7A). We further validated the presence of TasA in the  
434 bacterial cell membrane by using a strain carrying a TasA-mCherry translational fusion  
435 construct. Fluorescence microscopy showed an overlap between the TasA-mCherry  
436 signal and the membrane-specific dye FM 4-64 (Fig. 7D, top). Second, the surfaces of  
437 protoplasted cells, i.e., cells lacking the peptidoglycan layer, were decorated with  
438 fluorescent signal corresponding to the TasA-mCherry fusion protein (Fig. 7D bottom).  
439 Based on these results, we concluded that TasA is located in the DRM fraction of the  
440 cell membrane and that its absence leads to mislocalization and loss of the flotillin-like  
441 protein FloT and alterations in membrane dynamics and fluidity.

442

#### 443 **Mature TasA is required to maintain viable bacterial physiology**

444

445 TasA is a secreted protein located in the cell membrane and ECM, and reaching these  
446 sites requires the aid of secretion-dedicated chaperones, the translocase machinery  
447 and the membrane-bound signal peptidase SipW<sup>75</sup>. It is known that TasA processing is  
448 required for assembly of the amyloid fibrils and biofilm formation<sup>35,76</sup>. However,  
449 formation of the mature amyloid fibril requires the accessory protein TapA, which is  
450 also secreted via the same pathway<sup>36</sup>, is present in the mature amyloid fibers and is  
451 found on the cell surface<sup>76</sup>. Considering these points, we first wondered whether TapA  
452 is involved in the increased PCD observed in the  $\Delta$ *tasA* mutant. By applying the  
453 BacLight LIVE/DEAD viability stain to a  $\Delta$ *tapA* colony, we found a similar proportion of  
454 live to dead cells as that found in the WT colony at 72 h (Fig. 8A).  $\Delta$ *tapA* cells lack  
455 TasA fibers but still expose TasA in their surfaces<sup>76</sup>; thus we reasoned that mature  
456 TasA is necessary for preserving the cell viability levels observed in the WT strain. To  
457 test this possibility, we constructed a strain bearing a mutation in the part of the *tasA*  
458 gene that encodes the TasA signal peptide<sup>77</sup>. To avoid confounding effects due to  
459 expression of the mutated *tasA* gene in the presence of the endogenous operon, we  
460 performed this analysis in a strain in which the entire *tapA* operon was deleted and in  
461 which the modified operon encoding the mutated *tasA* allele was inserted into the  
462 neutral *lacA* locus. The strain carrying this construct was designated as “TasA

463 SiPmutant". The endogenous version of TasA successfully restored biofilm formation  
464 (Fig. S2B), while the phenotype of SiP mutant on MSgg medium at 72 h was different  
465 from those of both the WT and *tasA* mutant strains (Fig. 8B and Fig. S2B).  
466 Immunodetection analysis of TasA in fractionated biofilms confirmed the presence of  
467 TasA in the cells and ECM fractions from the WT strain and the strain expressing the  
468 endogenous version of *tasA* (Fig. 8C lanes 1 and 2 and 4 and 5 respectively).  
469 However, a faint anti-TasA reactive signal was observed in both fractions of the SiP  
470 mutant (Fig. 8C lanes 3 and 6). This result indicates that TasA is not efficiently  
471 processed in the SiP mutant and, thus, the protein levels in the ECM were drastically  
472 lower. The faint signal detected in the cell fraction might be due to the fact that the pre-  
473 processed protein is unstable in the cytoplasm and is eventually degraded over time<sup>77</sup>.  
474 Consistent with our hypothesis, the levels of cell death in the SiP mutant were  
475 significantly different from those of the WT strain (Fig. 8D). Taken together, these  
476 results rest relevance to TapA to the increase PCD observed in the absence of TasA  
477 and indicate that TasA must be processed to preserve the level of cell viability found in  
478 WT colonies.

479

#### 480 **Cells expressing a TasA variant have a restored physiological status but are** 481 **impaired in biofilm formation**

482

483 The fact that the  $\Delta tapA$  strain does not form TasA fibers but does have normal cell  
484 death as well as the increased membrane fluidity and mislocalization of the flotillin-like  
485 protein FloT in the  $\Delta tasA$  strain led us to hypothesize that the TasA in the DRM, and  
486 not that in the ECM, is responsible for maintaining the PCD levels within the WT  
487 colonies. To validate this hypothesis, we performed an alanine scanning experiment  
488 with TasA to obtain an allele encoding a stable version of the protein that could support  
489 biofilm formation. To produce these constructs, we used the same genetic background  
490 described in the above section. The strain JC81, which expresses the allele  
491 *TasA<sub>p.[Lys68\_Asp69delinsAlaAla]</sub>*, failed to rescue the biofilm formation phenotype in the WT  
492 strain (Fig. 9A and Fig. S7A). Immunodetection analysis of TasA in fractionated  
493 biofilms confirmed the presence of the mutated protein in the cells and in the ECM,  
494 indicating a malfunction in the protein's structural role in proper ECM assembly (Fig. 9B  
495 lanes 1-4 and S8B). The cell membrane fractionation analysis revealed, however, the  
496 presence of mutated TasA in the DRM, DSM and cytosolic fractions (Fig. 9B lanes 5-  
497 7). Accordingly, JC81 was reverted to a physiological status comparable to that of the  
498 WT strain. This feature was demonstrated by similar expression levels of genes  
499 encoding factors involved in the production of secondary metabolites (i.e., *ppsD*, *albE*,

500 *bacB*, *srfAA*) or acetoin (*alsS*), indicating comparable metabolic activities between the  
501 two strains (Fig. 9C). Further evidence confirmed the restoration of the metabolic  
502 status in JC81. First, similar proportions of WT and JC81 cells expressing YFP from the  
503 fengycin operon promoter were detected after 72 h of growth via flow cytometry  
504 analysis (Fig. 9D, green curve). In agreement with these findings, there were no  
505 differences in the proportions of cells respiring or accumulating ROS or in the  
506 intracellular pH values between the JC81 and WT strains (Fig. 9E and Fig. 9F).  
507 Consistently, the population dynamics of JC81 resembled that of the WT strain (fig.  
508 9G), and, as expected, its level of cell death was comparable to that of the WT strain  
509 (Fig. 9H). Finally, there were no differences in any of the examined parameters related  
510 to oxidative damage and PCD (i.e., DNA damage, membrane potential, susceptibility to  
511 lipid peroxidation and membrane fluidity) between JC81 and WT cells (Fig. S8, Fig. S9,  
512 Fig. S11, and Fig. S12, respectively). Taken together, these findings assign TasA  
513 complementary functions in the stabilization of cell membrane dynamics and cellular  
514 physiology during normal colony development that prevent premature PCD, a role  
515 beyond the well-known structural function of amyloid proteins in biofilm ECMs.

516

#### 517 **The TasA variant impairs *B. subtilis* survival and fitness on the phylloplane**

518

519 Our analysis of the intrinsic physiological changes in  $\Delta$ *tasA* cells showed how the  
520 absence of TasA leads to the accumulation of canonical signs of PCD, a physiological  
521 condition typical of stationary phase cells, and, ultimately, to the premature aging of  
522 bacterial colonies. These observations help to reconcile two *a priori* contradictory  
523 features of *B. subtilis* ecology on plant leaves: the reduced persistence of the  $\Delta$ *tasA*  
524 mutant on the melon phylloplane versus its ability to efficiently exert biocontrol against  
525 the fungus *P. xanthi*, which occurs via overproduction of fengycin and other  
526 antimicrobial molecules. Following this line of thought, we predicted that the JC81  
527 strain, which expresses a version of TasA that is unable to restore biofilm formation but  
528 preserves the physiological status of the cells, would show overall signs of reduced  
529 fitness on melon leaves. The JC81 cells retained their initial ability to adhere to melon  
530 leaves (Fig. 10A); however, their persistence decreased (Fig. 10B) and their  
531 colonization showed a pattern somewhat intermediate between those of the WT and  
532  $\Delta$ *tasA* strains (Fig. 10C). In agreement with our prediction, the reduced fitness of this  
533 strain resulted in a failure to manage *P. xanthi* infection (Fig. 10D). Thus, we conclude  
534 that the ECM, by means of the amyloid protein TasA, is required for normal  
535 colonization and persistence of *B. subtilis* on the phyllosphere. These ecological  
536 features depend on at least two complementary roles of TasA: one role related to ECM

537 assembly and a new proposed role in the preservation of the physiological status of  
538 cells via stabilization of membrane dynamics and the prevention of PCD.  
539

540

## 541 Discussion

542

543 The ECM provides cells with a myriad of advantages, such as robustness, colony  
544 cohesiveness, and protection against external aggression<sup>9,10,27</sup>. Studies of *B. subtilis*  
545 biofilms have revealed that the ECM is mainly composed of polysaccharides<sup>31</sup> and the  
546 proteins TasA and BslA<sup>27,32</sup>. TasA is a confirmed functional amyloid that provides  
547 structural support to the biofilm in the form of robust fibers<sup>33</sup>. A recent study  
548 demonstrated that there is heterogeneity in the secondary structure of TasA; however,  
549 in biofilms, its predominant conformation is in the form of stable fibers enriched in  $\beta$ -  
550 sheets<sup>34</sup>. In this study, we demonstrate that in addition to its structural role in ECM  
551 assembly, TasA is also required for normal colony development – both of which are  
552 functions that contribute to the full fitness of *Bacillus* cells on the phylloplane.

553

554 The physiological alterations observed in  $\Delta tasA$  null strain reflect a process of  
555 progressive cellular deterioration characteristic of senescence<sup>56-58</sup>, including early  
556 activation of secondary metabolism, low energy metabolic activity, and accumulation of  
557 damaged molecular machinery that is required for vital functions. Indeed, it has been  
558 previously demonstrated that such metabolic changes can trigger PCD in other  
559 bacterial species, in which over-acidification of the cytoplasm eventually leads to the  
560 activation of cell death pathways<sup>54</sup>. Interestingly, cytoplasmic acidification due to the  
561 production of acetic acid has been linked to higher ROS generation and accelerated  
562 aging in eukaryotes<sup>78</sup>. As mentioned throughout this study, ROS generation leads to  
563 ongoing DNA damage accumulation, phospholipid oxidation, and changes in cell  
564 membrane potential and functionality, all of which are major physiological changes that  
565 eventually lead to declines in cellular fitness and, ultimately, to cell death<sup>79,80,81</sup>. The  
566 fact that we could restore the physiological status of *tasA* null mutant cells by  
567 ectopically expressing a mutated TasA protein incapable of rescuing biofilm formation  
568 permitted us to separate two roles of TasA: i) its structural function, necessary for ECM  
569 assembly; and ii) its cytological functions involved in regulating membrane dynamics  
570 and PCD. Our data indicate that this previously unreported function does not involve  
571 TasA amyloid fibers or its role in ECM assembly, and that it is more likely related to the  
572 TasA found in the DRM of the cell membrane, where the FMMs (like the lipid rafts of  
573 eukaryotic cells) are located. It is not unprecedented that amyloid proteins interact with  
574 functional domains within the cell membrane. In eukaryotic cells, for instance, it has  
575 been reported that lipid rafts participate in the interaction between the amyloid  
576 precursor protein and the secretase required for the production of the amyloid- $\beta$



577 peptide, which is responsible for Alzheimer's disease<sup>82</sup>. Indeed, our results are  
578 supported by evidence that TasA can preferentially interact with model bacterial  
579 membranes, which affects fiber assembly<sup>83</sup>, and that TasA fibers are located and  
580 attached to the cell surface via a proposed interaction with TapA, which forms foci that  
581 seem to be present on the cell wall<sup>76</sup>. Interestingly, TapA has been recently  
582 characterized as a two-domain, partially disordered protein<sup>84</sup>. Disordered domains can  
583 be flexible enough to interact with multiple partners<sup>85,86</sup>, suggesting a similar  
584 mechanism for TapA: the N-terminal domain might be involved in the interaction with  
585 other protein partners, whereas the C-terminal disordered domain might anchor the  
586 protein to the cell surface. All of these observations led us to propose that TasA may  
587 drive the stabilization of the FMMs in the cell membrane either directly via interactions  
588 with certain phospholipids or indirectly via interactions with other proteins. This model  
589 is further supported by the fact that the  $\Delta$ *tasA* cells show mislocalization of FloT (Fig.  
590 7A), which is typically present in the FMM, and induction of many genes that encode  
591 DRM components or other factors that interact with FloT alone or with FloT and FloA  
592 (suppl. Table 4).

593

594 The physiological alterations observed in the  $\Delta$ *tasA* strain have ecological implications.  
595 The intrinsic stress affecting the mutant cells reduced their ability to survive in natural  
596 environments; however, paradoxically, their higher induction of secondary metabolism  
597 seemed to indirectly and efficiently target fungal pathogens. This scenario could  
598 explain why  $\Delta$ *tasA* cells, which show clear signs of stress, display efficient biocontrol  
599 properties against *P. xanthii*. However, the sharp time-dependent decrease in the  
600  $\Delta$ *tasA* population on leaves suggests that its antifungal production could be beneficial  
601 during short-term interactions, but insufficient to support long-term antagonism unless  
602 there is efficient colonization and persistence on the plant surface. We previously  
603 speculated that biofilm formation and antifungal production were two complementary  
604 tools used by *Bacillus* cells to efficiently combat fungi. Our current study supports this  
605 concept, but also enhances our understanding of the roles of the different ECM  
606 components. More specifically, we demonstrated that the amyloid protein TasA is the  
607 most important bacterial factor during the initial attachment and further colonization of  
608 the plant host. Two lines of evidence downplay the importance of the EPS during the  
609 early establishment of physical contact. First, an EPS mutant strain behaves similarly  
610 to the WT strain, and second, the naturally occurring overexpression of the *eps* genes  
611 in the  $\Delta$ *tasA* were unable to revert the adhesion defect. These observations are more  
612 consistent with a role for the EPS, along with BslA, in providing biofilms with protection  
613 against external aggressors<sup>31,87</sup>. A similar role for a functional amyloid protein in



614 bacterial attachment to plant surfaces was found for the *Escherichia coli* curli protein.  
615 Transcriptomic studies showed induction of curli expression during the earlier stages of  
616 attachment after the cells came into contact with the plant surface, and a curli mutant  
617 strain was defective in this interaction<sup>88,89</sup>. The distinct morphological and biochemical  
618 variations typical of amyloids make them perfect candidates for modulating cellular  
619 ecology. The observation that  $\Delta$ *tasA* cells are incapable of colonization in the  
620 rhizosphere<sup>90</sup> clearly indicates the need for more in-depth investigation into these two  
621 distinctive ecological niches to understand the true roles of specific bacterial  
622 components. In addition to demonstrating enhanced production of antifungal  
623 compounds, our study revealed additional features that might contribute to the potency  
624 of stressed *Bacillus* cells in arresting fungal growth, in particular the overproduction of  
625 acetoin via increased expression of the *alsS* and *alsD* genes. Acetoin is a volatile  
626 compound produced via fermentative and overflow metabolism, and it has been  
627 demonstrated to mediate communication between beneficial bacteria and plants by  
628 activating plant defense mechanisms either locally or over long distances in a  
629 phenomenon known as induced systemic resistance (ISR)<sup>91,92</sup>.

630

631 In summary, we have proven that the amyloid protein TasA participates in the proper  
632 maturation of *Bacillus* colonies, a function that, along with its previously reported role in  
633 ECM assembly, contributes to long-term survival, efficient colonization of the  
634 phylloplane, and a competitive advantage against competitors mediated by antifungal  
635 production. The absence of TasA leads to a series of physiological changes, likely  
636 triggered by alterations in membrane dynamics and effects on the FMMs, including an  
637 arrest of cell differentiation<sup>9</sup> that paradoxically increases the competitiveness of the  
638 mutant cells during short-term interactions via their ability to adapt to stress and their  
639 cellular response to early maturation. However, lack of TasA reduces cell fitness during  
640 mid- to long-term interactions via increased intrinsic cellular stress and the absence of  
641 a structured ECM, both of which limit the adaptability of the cells to the stressful  
642 phylloplane.

643

## 644 **Material and methods**

645

### 646 *Bacterial strains and culture conditions*

647

648 The bacterial strains used in this study are listed in supplementary table 1. Bacterial  
649 cultures were grown at 37 °C from frozen stocks on Luria-Bertani (LB: 1% tryptone  
650 (Oxoid), 0.5% yeast extract (Oxoid) and 0.5% NaCl) plates. Isolated bacteria were  
651 inoculated in the appropriate medium. The biotrophic fungus *Podosphaera xanthii* was  
652 grown at 25 °C from a frozen stock on cucumber cotyledons and maintained on them  
653 until inoculum preparation. Biofilm assays were performed on MSgg medium: 100 mM  
654 morpholinepropane sulphonic acid (MOPS) (pH 7), 0.5% glycerol, 0.5% glutamate, 5  
655 mM potassium phosphate (pH 7), 50 µg/ml tryptophan, 50 µg/ml phenylalanine, 50  
656 µg/ml threonine, 2 mM MgCl<sub>2</sub>, 700 µM CaCl<sub>2</sub>, 50 µM FeCl<sub>3</sub>, 50 µM MnCl<sub>2</sub>, 2 µM  
657 thiamine, 1 µM ZnCl<sub>2</sub>. For the *in vitro* lipopeptide detection and assays with cell-free  
658 supernatants, medium optimized for lipopeptide production (MOLP) was used and  
659 prepared as previously described<sup>93</sup>. For cloning and plasmid replication, *Escherichia*  
660 *coli* DH5α was used. *Bacillus subtilis* 168 is a domesticated strain used to transform  
661 the different constructs into *Bacillus subtilis* NCIB3610. The antibiotic final  
662 concentrations for *B. subtilis* were: MLS (1 µg/ml erythromycin, 25 µg/ml lincomycin);  
663 spectinomycin (100 µg/ml); tetracycline (10 µg/ml); chloramphenicol (5 µg/ml);  
664 kanamycin (10 µg/ml).

665

### 666 *Strain construction*

667

668 All of the primers used to generate the different strains are listed in Supplementary  
669 table 2. To build the strain YNG001, the promoter of the fengycin operon was amplified  
670 with the Ppps-ecoRI.F and Ppps-HindIII.R primer pair. The PCR product was digested  
671 with EcoRI and HindIII and cloned into the pKM003 vector cut with the same enzymes.  
672 The resulting plasmid was transformed by natural competence into *B. subtilis* 168  
673 replacing the *amyE* neutral locus. Transformants were selected via spectinomycin  
674 resistance. The same plasmid was used to build the strain YNG002 by transforming a  
675  $\Delta$ *tasA* strain of *B. subtilis* 168. Strains DR8 and DR9 were constructed similarly by  
676 amplifying the promoter of the *epsA-O* operon with the primers Peps-ecoRI.F and  
677 Peps-HindIII.R and then cloning the insert into pKM003. The plasmid was transformed  
678 into the WT (DR8) and  $\Delta$ *tasA* (DR9) *B. subtilis* 168 strains.

679

680 Strain YNG003 was constructed using the primers amyEUP-Fw, amyEUP-Rv, Ppps-  
681 Fw, Ppps-Rv, Yfp-Fw, Yfp-Rv, Cat-Fw, Cat-Rv, amyEDOWN-Fw, amyEDOWN-Rv to  
682 separately amplify the relevant fragments. The fragments were then joined using the  
683 NEB builder HiFi DNA Assembly Master Mix (New England Biolabs). The construct  
684 was made using pUC19 digested with BamHI as the vector backbone. The final  
685 plasmid was then transformed into *B. subtilis* 168 replacing *amyE*, and transformants  
686 were selected via chloramphenicol resistance.

687

688 Strain JC97 was generated using the primers bslAUP-Fw, bslADOWN-Rv, Spc-Fw,  
689 Spc-Rv, bslAUP-Fw and bslADOWN-Rv and XbaI-digested pUC19 as the vector  
690 backbone. The fragments were assembled using NEB Builder HiFi DNA Assembly  
691 Master Mix.

692

693 Strains JC70, JC81 and JC149 were constructed via site-directed mutagenesis  
694 (QuickChange Lightning Site Directed Mutagenesis Kit – Agilent Technologies). Briefly,  
695 the *tapA* operon (*tapA-sipW-tasA*), including its promoter, was amplified using the  
696 primers TasA\_1\_mutb and YSRI\_2, and the resulting product was digested with BamHI  
697 and Sall and cloned into the pDR183 vector<sup>94</sup>. Next, the corresponding primers (see  
698 suppl. Table 5A) were used to introduce the alanine substitution mutations into the  
699 desired positions of the TasA amino acid sequence. The entire plasmid was amplified  
700 from the position of the primers using Pfu DNA polymerase. The native plasmid, which  
701 was methylated and lacked the mutations, was digested with DpnI enzyme. The  
702 plasmids containing the native version of TasA (JC70) or the mutated versions (JC81  
703 and JC149) were transformed into the *B. subtilis* 168  $\Delta(tapA-sipW-tasA)$  strain  
704 replacing the *lacA* neutral locus. Genetic complementation was observed in strain  
705 JC70 as a control. Transformants were selected via MLS resistance.

706

707 All of the *B. subtilis* strains generated were constructed by transforming *B. subtilis* 168  
708 via its natural competence and then using the positive clones as donors for transferring  
709 the constructs into *Bacillus subtilis* NCIB3610 via generalized SPP1 phage  
710 transduction<sup>95</sup>.

711

### 712 *Biofilm assays*

713

714 To analyze colony morphology under biofilm-inducing conditions, we used a method  
715 described elsewhere<sup>96</sup>. Briefly, the bacterial strains were grown on LB plates overnight  
716 at 37 °C, and the resulting colonies were resuspended in sterile distilled water at an

717 OD<sub>600</sub> of 1. Next, 2- $\mu$ l drops of the different bacterial suspensions were spotted on  
718 MSgg agar plates and incubated at 30 °C. Colonies were removed at the appropriate  
719 time points (24, 48 and 72 h) for the different analyses.

720 For the CFU counts of the colonies from the different strains, 24-, 48- and 72-hour-old  
721 colonies grown on MSgg agar plates were removed, resuspended in 1 ml of sterile  
722 distilled water, and subjected to mild sonication (three rounds of 20 second pulses at  
723 20% amplitude). The resulting suspensions were serially diluted and plated to calculate  
724 the CFUs per colony (total CFU). To estimate the CFUs corresponding to sporulated  
725 cells (CFU endospores), the same dilutions were heated at 80 °C for 10 minutes and  
726 plated. The sporulation percentage was calculated as (CFU endospores/total  
727 CFU)\*100.

728

### 729 *Biofilm fractionation*

730

731 To analyze the presence of TasA in the different strains, biofilms were fractionated into  
732 cells and ECM as described elsewhere<sup>96</sup>, and both fractions were analyzed separately.  
733 Briefly, 72-hour-old colonies grown under biofilm-inducing conditions on MSgg-agar  
734 plates were carefully lifted from the plates and resuspended in 10 ml of MS medium  
735 (MSgg broth without glycerol and glutamate, which were replaced by water) with a 25  
736 <sup>5/8</sup> G needle. Next, the samples were subjected to mild sonication in a Branson 450  
737 digital sonifier (4-5 5 seconds pulses at 20% amplitude) to ensure bacterial  
738 resuspension. The bacterial suspensions were centrifuged at 9000 g for 20 minutes to  
739 separate the cells from the extracellular matrix. The cell fraction was resuspended in  
740 10 ml of MS medium and stored at 4 °C until further processing. The ECM fraction was  
741 filtered through a 0.22  $\mu$ m filter and stored at 4 °C.

742

743 For protein precipitation, 2 ml of the cell or ECM fractions were used. The cell fraction  
744 was treated with 0.1 mg/ml lysozyme for 30 minutes at 37 °C. Next, both fractions were  
745 treated with a 10% final concentration of trichloroacetic acid and incubated in ice for 1  
746 h. Proteins were collected by centrifugation at 13,000 g for 20 minutes, washed twice  
747 with ice-cold acetone, and dried in an Eppendorf Concentrator Plus 5305 (Eppendorf).

748

### 749 *Cell membrane fractionation*

750

751 Crude membrane extracts were purified from 50 ml MSgg liquid cultures (with shaking)  
752 of the different *B. subtilis* strains. Cultures were centrifuged at 7,000 g for 10 minutes at  
753 4 °C and then resuspended in 10 ml of PBS. Lysozyme was added at a final

754 concentration of 20 µg/ml and the cell suspensions were incubated at 37 °C for 30  
755 minutes. After incubation, the lysates were sonicated on ice with a Branson 450 digital  
756 sonifier using a cell disruptor tip and 45 second pulses at 50% amplitude with pauses  
757 of 30 seconds between pulses until the lysates were clear. Next, the cell lysates were  
758 centrifuged at 10,000 g for 15 minutes to eliminate cell debris, and the supernatants  
759 were separated and passed through a 0.45 µm filter. To isolate the cell membrane, the  
760 filtered lysate was ultracentrifuged at 100,000 g for 1 hour at 4 °C. The supernatant,  
761 which contained the cytosolic proteins, was separated and kept at -20 °C. The pellet,  
762 which contained the crude membrane extract, was washed 3 times with PBS and  
763 processed using the CellLytic MEM protein extraction kit from Sigma. Briefly, the  
764 membrane fractions were resuspended in 600 µl of lysis and separation working  
765 solution (lysis and separation buffer + protease inhibitor cocktail) until a homogeneous  
766 suspension was achieved. Next, the suspension was incubated overnight at 4 °C on a  
767 stirring wheel. After incubation, the suspension is incubated at 37 °C for 30 minutes  
768 and then centrifuged at 3,000 g for 3 minutes. The DSM (upper phase) was separated  
769 and kept at -20 °C, and the DRM (lower phase) was washed three times with 400 µl of  
770 wash buffer by repeating the process from the 37 °C incubation step. Three washes  
771 were performed to ensure the removal of all hydrophilic proteins. The isolated DRM  
772 was kept at -20 °C until use. The DRM, DSM and cytosolic fractions were used directly  
773 for immunodetection.

774

#### 775 *SDS-PAGE and immunodetection*

776

777 Precipitated proteins were resuspended in 1x Laemmli sample buffer (BioRad) and  
778 heated at 100 °C for 5 minutes. Proteins were separated via SDS-PAGE in 13%  
779 acrylamide gels and then transferred onto PVDF membranes using the Trans-Blot  
780 Turbo Transfer System (BioRad) and PVDF transfer packs (BioRad). For  
781 immunodetection of TasA, the membranes were probed with anti-TasA antibody  
782 (rabbit) used at a 1:20,000 dilution in Pierce Protein-Free (TBS) blocking buffer  
783 (ThermoFisher). For immunodetection of FloT-YFP, a commercial anti-GFP primary  
784 antibody (Clontech living colors full-length polyclonal antibody) developed in rabbit was  
785 used at a 1:1,000 dilution in the buffer mentioned above. A secondary anti-rabbit IgG  
786 antibody conjugated to horseradish peroxidase (BioRad) was used at a 1:3,000 dilution  
787 in the same buffer. The membranes were developed using the Pierce ECL Western  
788 Blotting Substrate (ThermoFisher).

789

#### 790 *Bioassays on melon leaves*

791

792 Bacterial strains were grown in liquid LB at 30 °C overnight. The cells in the cultures  
793 were washed twice with sterile distilled water. The bacterial cell suspensions were  
794 adjusted to the same OD<sub>600</sub> and sprayed onto leaves of 4- to 5-week-old melon plants.  
795 Two hours later, a suspension of *P. xanthii* conidia was sprayed onto each leaf at a  
796 concentration of 4–10x10<sup>4</sup> spores/ml. The plants were placed in a greenhouse or in a  
797 growth chamber at 25 °C with a 16 h photoperiod, 3800 lux and 85% RH. The severity  
798 of the symptoms was evaluated as the percentage of leaf covered by powdery mildew,  
799 as previously described<sup>97</sup>. Briefly, the entire leaf area and the powdery mildew damage  
800 area were measured using FiJi<sup>98</sup>, and the ratio of infection was calculated using the  
801 formula [(damage area/leaf area)\*100].

802

803 The persistence of bacterial strains on plant leaves was calculated via CFU counts  
804 performed over the twenty-one days following inoculation. Three different leaves from  
805 three different plants were individually placed into sterile plastic stomacher bags and  
806 homogenized in a lab blender (Colworth Stomacher-400, Seward, London, UK) for 3  
807 min in 10 ml of sterile distilled water. The leaf extracts were serially diluted and plated  
808 to calculate the CFUs at each time point. The plates were incubated at 37 °C for 24 h  
809 before counting.

810

811 The adhesion of bacterial cells to melon leaves was estimated by comparing the  
812 number of cells released from the leaf versus the cells attached to the surface. The  
813 surfaces of individual leaves were placed in contact with 100 ml of sterile distilled water  
814 in glass beakers and, after 10 minutes of stirring (300 rpm), the water and leaf were  
815 plated separately. The leaves were processed as described above. Adhesion was  
816 calculated as the ratio: (water CFU/total CFU)\*100. The data from all of the different  
817 strains were normalized to the result of the WT strain (100% adhesion).

818

819 *Antifungal activity of cell-free supernatant against Podosphaera xanthii*

820

821 *B. subtilis* strains were grown for 72 h at 30 °C in medium optimized to encourage  
822 lipopeptide production (MOLP), and the supernatant was centrifuged and filtered (0.22  
823 µm). One-week-old cotyledons were disinfected with 20% commercial bleach for 30  
824 seconds and then submerged two times in sterile distilled water for 2 minutes and then  
825 air dried. 10-mm discs were excised with a sterilized cork borer, incubated with cell-free  
826 supernatants for 2 h, and then left to dry. Finally, the discs were inoculated with *P.*  
827 *xanthii* conidia as previously described<sup>99</sup>.

828

829

830

831

832

833

834 *Lipopeptides production analysis*

835

836 For the *in vitro* lipopeptide detection, bacteria were grown in MOLP for 72 h. The  
837 cultures were centrifuged, and the supernatants were filtered (0.22 µm) prior to  
838 analysis via MALDI-TOF/TOF. For *in situ* lipopeptide detection on inoculated leaves,  
839 leaf discs were taken 21 days post-inoculation with a sterile cork borer and then placed  
840 directly on an UltrafleXtreme MALDI plate. A matrix consisting of a combination of  
841 CHCA ( $\alpha$ -cyano-4-hydroxycinnamic acid) and DHB (2,5-dihydroxybenzoic acid) was  
842 deposited over the discs or the supernatants (for the *in vitro* culture), and the plates  
843 were inserted into an UltrafleXtreme MALDI-TOF/TOF mass spectrometer. The mass  
844 spectra were acquired using the Bruker Daltonics FlexControl software and were  
845 processed using Bruker Daltonics FlexAnalysis.

846

847 *Electron microscopy analysis*

848

849 For the scanning electron microscopy analysis, leaf discs were taken 21 days post-  
850 inoculation as previously described and fixed in 0.1 M sodium cacodylate and 2%  
851 glutaraldehyde overnight at 4 °C. Three washes were performed with 0.1 M sodium  
852 cacodylate and 0.1 M sucrose followed by ethanol dehydration in a series of ethanol  
853 solutions from 50% to 100%. A final drying with hexamethyldisilazane was performed  
854 as indicated<sup>100</sup>. The dried samples were coated with a thin layer of iridium using an  
855 Emitech K575x turbo sputtering coater before viewing in a Helios Nanolab 650  
856 Scanning Electron Microscope and Focus Ion Beam (SEM-FIB) with a Schottky-type  
857 field emission electron gun.

858

859 For the transmission electron microscopy analysis, bacterial colonies grown on MSgg  
860 agar for the appropriate times were fixed directly using a 2% paraformaldehyde-2.5%  
861 glutaraldehyde-0.2 M sucrose mix in phosphate buffer 0.1 M (PB) overnight at 4 °C.  
862 After three washes in PB, portions were excised from each colony and then post-fixed  
863 with 1% osmium tetroxide solution in PB for 90 minutes at room temperature, followed  
864 by PB washes, and 15 minutes of stepwise dehydration in an ethanol series (30%,



865 50%, 70%, 90%, and 100% twice). Between the 50% and 70% steps, colonies were  
866 incubated *in-bloc* in 2% uranyl acetate solution in 50% ethanol at 4 °C, overnight.  
867 Following dehydration, the samples were gradually embedded in low-viscosity Spurr's  
868 resin: resin:ethanol, 1:1, 4 hours; resin:ethanol, 3:1, 4 hours; and pure resin, overnight.  
869 The sample blocks were embedded in capsule molds containing pure resin for 72 h at  
870 70 °C. The samples were visualized under a FEI Tecnai G<sup>2</sup> 20 TWIN Transmission  
871 Electron Microscope at an accelerating voltage of 80 KV. The images were taken using  
872 a side-mounted CCD Olympus Veleta with 2k x 2k Mp.

873

#### 874 *Whole-transcriptome analysis and qRT-PCR*

875

876 Biofilms were grown on MSgg agar as described above. After 72 h of growth, colonies  
877 were recovered and stored at -80 °C. All of the assays were performed in duplicate.  
878 The collected cells were resuspended and homogenized via passage through a 25<sup>5/8</sup>  
879 G needle in BirnBoim A<sup>101</sup> buffer (20% sucrose, 10 mM Tris-HCl pH 8, 10 mM EDTA  
880 and 50 mM NaCl). Lysozyme (10 mg/ml) was added, and the mixture was incubated  
881 for 30 minutes at 37 °C. After disruption, the suspensions were centrifuged, and the  
882 pellets were resuspended in Trizol reagent (Invitrogen). Total RNA extraction was  
883 performed as instructed by the manufacturer. DNA removal was carried out via in-  
884 column treatment with the rDNase included in the Nucleo-Spin RNA Plant Kit  
885 (Macherey-Nagel) following the instructions of the manufacturer. The integrity and  
886 quality of the total RNA was assessed with an Agilent 2100 Bioanalyzer (Agilent  
887 Technologies) and by gel electrophoresis.

888

889 To perform the RNA sequencing analysis, rRNA removal was performed using the  
890 RiboZero rRNA removal (bacteria) Kit from Illumina, and 100-bp single-end read  
891 libraries were prepared using the TruSeq Stranded Total RNA Kit (Illumina). The  
892 libraries were sequenced using a NextSeq550 instrument (Illumina). The data analysis  
893 was performed using fastQC for sample quality control, EdgePRO<sup>102</sup> for mapping  
894 against reference genomes (*B. subtilis* 168 was used for NCIB3610, Genbank:  
895 NC\_000964.3) and quantifying gene expression, NOIseq<sup>103</sup> to normalize the samples,  
896 and edgeR<sup>102</sup> for differential expression analysis. Genes were considered differentially  
897 expressed when their logFC was higher than 1 or lower than -1 with a p-value < 0.05.  
898 The data were deposited in the GEO database (GEO accession GSE124307).

899

900 Quantitative real-time (qRT)-PCR was performed using the iCycler-iQ system and the  
901 iQ SYBR Green Supermix Kit from Bio-Rad. The primer pairs used to amplify the target



902 genes were designed using the Primer3 software (<http://bioinfo.ut.ee/primer3/>) and  
903 Beacon designer (<http://www.premierbiosoft.com/qOligo/Oligo.jsp?PID=1>), maintaining  
904 the parameters described elsewhere<sup>104</sup>. For the qRT-PCR assays, the RNA  
905 concentration was adjusted to 100 ng/μl. Next, 1 μg of DNA-free total RNA was retro-  
906 transcribed into cDNA using the SuperScript III reverse transcriptase (Invitrogen) and  
907 random hexamers in a final reaction volume of 20 μl according to the instructions  
908 provided by the manufacturer. The qRT-PCR cycle was: 95 °C for 3 min, followed by  
909 PCR amplification using a 40-cycle amplification program (95 °C for 20 sec, 56 °C for  
910 30 sec, and 72 °C for 30 sec), followed by a third step of 95 °C for 30 sec. To evaluate  
911 the melting curve, 40 additional cycles of 15 sec each starting at 75 °C with stepwise  
912 temperature increases of 0.5 °C per cycle were performed. To normalize the data, the  
913 *rpsJ* gene, encoding the 30S ribosomal protein S10, was used as a reference gene<sup>105</sup>.  
914 The target genes *fenD*, encoding fengycin synthetase D, *alsS*, encoding acetolactate  
915 synthase, *albE*, encoding bacteriocin subtilisin biosynthesis protein AlbE, *bacB*,  
916 encoding the bacilysin biosynthesis protein BacB, and *srfAA* encoding surfactin  
917 synthetase A, were amplified using the primer pairs given in supplementary Table 3,  
918 resulting in the generation of fragments of 147 bp, 82 bp, 185 bp, 160 bp and 94 bp,  
919 respectively. The primer efficiency tests and confirmation of the specificity of the  
920 amplification reactions were performed as previously described<sup>106</sup>. The relative  
921 transcript abundance was estimated using the  $\Delta\Delta$  cyclethreshold (Ct) method<sup>107</sup>.  
922 Transcriptional data of the target genes was normalized to the *rpsJ* gene and shown as  
923 the fold-changes in the expression levels of the target genes in each *B. subtilis* mutant  
924 strain compared to those in the WT strain. The relative expression ratios were  
925 calculated as the difference between the qPCR threshold cycles (Ct) of the target gene  
926 and the Ct of the *rpsJ* gene ( $\Delta\text{Ct} = \text{Ct}_{\text{gene of interest}} - \text{Ct}_{\text{rpsJ}}$ ). Fold-change values  
927 were calculated as  $2^{-\Delta\Delta\text{Ct}}$ , assuming that one PCR cycle represents a two-fold  
928 difference in template abundance<sup>108,109</sup>. The qRT-PCR analyses were performed three  
929 times (technical replicates) using three independent RNA isolations (biological  
930 replicates).

931

### 932 *Flow cytometry assays*

933

934 Cells were grown on MSgg agar at 30 °C. At different time points, colonies were  
935 recovered in 500 μL of PBS and resuspended with a 25<sup>5/8</sup> G needle. For the promoter  
936 expression assays, colonies were gently sonicated as described above to ensure  
937 complete resuspension, and the cells were fixed in 4% paraformaldehyde in PBS and  
938 washed three times in PBS. To evaluate the physiological status of the different *B.*

939 *subtilis* strains, cells were stained for 30 minutes with 5 mM 5-cyano-2,3-  
940 ditolyltetrazolium chloride (CTC) and 15  $\mu$ M 3-(p-hydroxyphenyl) fluorescein (HPF).

941

942 The flow cytometry runs were performed with 200  $\mu$ l of cell suspensions in 800  $\mu$ l of  
943 GTE buffer (50 mM glucose, 10 mM EDTA, 20 mM Tris-HCl; pH 8), and the cells were  
944 measured on a Beckman Coulter Gallios™ flow cytometer using 488 nm excitation.  
945 YFP and HPF fluorescence were detected with 550 SP or 525/40 BP filters. CTC  
946 fluorescence was detected with 730 SP and 695/30BP filters. The data were collected  
947 using Gallios™ Software v1.2 and further analyzed using Kaluza Analysis v1.3.

948

#### 949 *Intracellular pH analysis*

950

951 Intracellular pH was measured as previously described<sup>54</sup>. Briefly, colonies of the  
952 different strains grown on MSgg agar at 30 °C were taken at different time points and  
953 recovered in potassium phosphate buffer (PPB) pH 7 and gently sonicated as  
954 described above. Next, the cells were incubated in 10  $\mu$ l of 1 mM 5-  
955 (6)carboxyfluorescein diacetate succinimidyl (CFDA) for 15 minutes at 30 °C. PPB  
956 supplemented with glucose (10 mM) was added to the cells for 15 minutes at 30 °C to  
957 remove the excess dye. After two washes with the same buffer, the cells were  
958 resuspended in 50 mM PPB (pH 4.5).

959

960 Fluorescence was measured in a FLUOstar Omega (BMG labtech) microplate  
961 spectrofluorometer using 490nm/525nm as the excitation and emission wavelengths,  
962 respectively. Conversion from the fluorescence arbitrary units into pH units was  
963 performed using a standard calibration curve.

964

#### 965 *Fluorescence microscopy*

966

967 The localization of TasA in *B. subtilis* protoplasts was evaluated using a TasA-mCherry  
968 translational fusion (see suppl. Table 5). To generate the protoplast cells, *B. subtilis*  
969 colonies of the different strains grown on MSgg agar plates for 72 h were resuspended  
970 in protoplast buffer (20 mM potassium phosphate, pH 7.5, 15 mM MgCl<sub>2</sub>, 20%  
971 sucrose), mildly sonicated as describe above and incubated for 30 min in the presence  
972 of 10  $\mu$ g/ml lysozyme at 37 °C. The protoplast suspensions were mounted and  
973 visualized immediately under a Leica DM2500 LED fluorescence microscope with  
974 standard Texas Red (TX2 Ex. 560/40 Em. 645/76) filter to visualize cells expressing

975 the *tasA-mCherry* construct. The images were taken with a Leica DFC 7000T 2.8 MP  
976 camera.

977

978 FM 4-64 was purchased from ThermoFischer and was used at a final concentration of  
979 5 µg/ml and was visualized using a standard GFP filter (GFP Ex. 470/40 Em. 525/50)

980

981 *Confocal laser scanning microscopy (CLSM)*

982

983 Cell death in the bacterial colonies was evaluated using the LIVE/DEAD BacLight  
984 Bacterial Viability Kit (Invitrogen). Equal volumes of both components included in the kit  
985 were mixed, and 2 µl of this solution was used to stain 1 ml of the corresponding  
986 bacterial suspension. Sequential acquisitions were configured to visualize the live or  
987 dead bacteria in the samples. Acquisitions with excitation at 488 nm and emission  
988 recorded from 499 to 554 nm were used to capture the images from live bacteria,  
989 followed by a second acquisition with excitation at 561 nm and emission recorded from  
990 592 to 688 nm for dead bacteria.

991

992 For the microscopic analysis and quantification of lipid peroxidation in live bacterial  
993 samples, we used the image-iT Lipid Peroxidation Kit (Invitrogen) following the  
994 manufacturer's instructions with some slight modifications. Briefly, colonies of the  
995 different strains were grown on MSgg plates at 30 °C, isolated at different time points,  
996 and resuspended in 1 ml of liquid MSgg medium as described in the previous sections.  
997 5 mM cumene hydroperoxide (CuHpx)-treated cell suspensions of the different strains  
998 at the corresponding times were used as controls. The cell suspensions were then  
999 incubated at 30 °C for 2 h and then stained with a 10 µM solution of the imageIT lipid  
1000 peroxidation sensor for 30 minutes. Finally, the cells were washed three times with  
1001 PBS, mounted, and visualized immediately. Images of the stained bacteria were  
1002 acquired sequentially to obtain images from the oxidized to the reduced states of the  
1003 dye. The first image (oxidized channel) was acquired by exciting the sensor at 488 nm  
1004 and recording the emissions from 509 to 561 nm, followed by a second acquisition  
1005 (reduced channel) with excitement at 561 nm and recording of the emissions from 590  
1006 to 613 nm.

1007

1008 Membrane potential was evaluated using the image-iT TMRM (tetramethylrhodamine,  
1009 methyl ester) reagent (Invitrogen) following the manufacturer's instructions. Colonies  
1010 grown at 30 °C on MSgg solid medium were isolated at different time points and  
1011 resuspended as described above. Samples treated prior to staining with 20 µM

1012 carbonyl cyanide m-chlorophenyl hydrazine (CCCP), a known protonophore and  
1013 uncoupler of bacterial oxidative phosphorylation, were used as controls (Fig. S11). The  
1014 TMRM reagent was added to the bacterial suspensions to a final concentration of 100  
1015 nM, and the mixtures were incubated at 37 °C for 30 minutes. After incubation, the  
1016 cells were immediately visualized by CLSM with excitation at 561 nm and emission  
1017 detection between 576 and 683 nm.

1018

1019 The amounts of DNA damage in the *B. subtilis* strains at the different time points were  
1020 evaluated via terminal deoxynucleotidyl transferase (TdT) dUTP Nick-End Labeling  
1021 (TUNEL) using the *In-Situ* Cell Death Detection Kit with fluorescein (Roche) according  
1022 to the manufacturer's instructions. *B. subtilis* colonies were resuspended in PBS and  
1023 processed as described above. The cells were centrifuged and resuspended in 1%  
1024 paraformaldehyde in PBS and fixed at room temperature for one hour on a rolling  
1025 shaker. The cells were then washed twice in PBS and permeabilized in 0.1% Triton X-  
1026 100 and 0.1% sodium citrate for 30 minutes at room temperature with shaking. After  
1027 permeabilization, the cells were washed twice with PBS and the pellets were  
1028 resuspended in 50 µl of the TUNEL reaction mixture (45 µl label solution + 5 µl enzyme  
1029 solution), and the reactions were incubated for one hour at 37°C in the dark with  
1030 shaking. Finally, the cells were washed twice in PBS, counterstained with DAPI (final  
1031 concentration 500 nM), mounted, and visualized by CLSM with excitation at 488 nm  
1032 and emission detection between 497 and 584 nm.

1033

1034 Membrane fluidity was evaluated via Laurdan generalized polarization (GP) as  
1035 described previously<sup>110</sup> with some modifications. Colonies of the different *B. subtilis*  
1036 strains were grown and processed as described above. The colonies were  
1037 resuspended in 50 mM Tris pH 7.4 with 0.5% NaCl. Laurdan reagent (6-dodecanoyl-  
1038 N,N-dimethyl-2-naphthylamine) was purchased from Sigma-Aldrich (Merck) and  
1039 dissolved in N,N-dimethylformamide (DMF). Samples treated prior to staining with 2%  
1040 benzyl alcohol, a substance known to increase lipid fluidity<sup>111</sup>, were used as positive  
1041 controls (Fig. S14). Laurdan was added to the bacterial suspensions to a final  
1042 concentration of 100 µM. The cells were incubated at room temperature for 10 minutes,  
1043 mounted, and then visualized immediately using two-photon excitation with a  
1044 Spectraphysics MaiTai Pulsed Laser tuned to 720 nm (roughly equivalent to 360 nm  
1045 single photon excitation), attached to a Leica SP5 microscope. Emissions between 432  
1046 and 482 nm (gel phase) and between 509 to 547 nm (liquid phase) were recorded  
1047 using the internal PMT detectors.

1048

1049 The localization of FloT in *B. subtilis* cells was evaluated using a FloT-YFP  
1050 translational fusion (see suppl. Table 5). Colonies grown at 30 °C on MSgg solid  
1051 medium were isolated at different time points and resuspended as described above.  
1052 Samples were mounted and visualized immediately with excitation at 514 nm and  
1053 emission recorded from 518 to 596 nm.

1054

1055 All images were obtained by visualizing the samples using an inverted Leica SP5  
1056 system with a 63x NA 1.4 HCX PL APO oil-immersion objective. For each experiment,  
1057 the laser settings, scan speed, PMT or HyD detector gain, and pinhole aperture were  
1058 kept constant for all of the acquired images.

1059

#### 1060 *Image analysis*

1061

1062 Image processing was performed using Leica LAS AF (LCS Lite, Leica Microsystems)  
1063 and FIJI/ImageJ software.

1064

1065 Images of live and dead bacteria from viability experiments were processed  
1066 automatically, counting the number of live (green) or dead (red) bacteria in their  
1067 corresponding channels. The percentage of dead cells was calculated dividing the  
1068 number of dead cells by the total number of bacteria found on a field.

1069

1070 For processing the lipid peroxidation images, images corresponding to the reduced and  
1071 oxidized channels were smoothed and a value of 3 was then subtracted from the two  
1072 channels to eliminate the background. The ratio image was calculated by dividing the  
1073 processed reduced channel by the oxidized channel using the Fiji image calculator  
1074 tool. The ratio images were pseudo-colored using a color intensity look-up table (LUT),  
1075 and intensity values of min. 0 and max. 50 were selected. All of the images were batch  
1076 processed with a custom imageJ macro, in which the same processing options were  
1077 applied to all of the acquired images. Quantification of the lipid peroxidation was  
1078 performed in Imaris v7.4 (Bitplane) by quantifying the pixel intensity of the ratio images  
1079 with the Imaris “spots” tool.

1080

1081 The Laurdan GP acquisitions were processed similarly. Images corresponding to the  
1082 gel phase channel and the liquid phase channel were smoothed and a value of 10 was  
1083 subtracted to eliminate the background. The Laurdan GP image was then calculated by  
1084 applying the following formula:

1085

(gel phase channel - liquid phase channel)  
(gel phase channel + liquid phase channel)

1086

1087 The calculation was performed step by step using the FiJi image calculator tool. Pixels  
1088 with high Laurdan GP values, typically caused by residual background noise, were  
1089 eliminated with the “Remove outliers” option using a radius of 4 and a threshold of 5.  
1090 Finally, the Laurdan GP images were pseudo-colored using a color intensity LUT, and  
1091 intensity values of min. 0 and max. 1.5 were selected. This processing was applied to  
1092 all of the acquisitions for this experiment. To quantify the Laurdan GP, bright field  
1093 images were used for thresholding and counting to create counts masks that were  
1094 applied to the Laurdan GP images to measure the mean Laurdan GP value for each  
1095 bacterium.

1096

1097 TUNEL images were analyzed by subtracting a value of 10 in the TUNEL channel to  
1098 eliminate the background. The DAPI channel was then used for thresholding and  
1099 counting as described above to quantify the TUNEL signal. The same parameters were  
1100 used to batch process and quantify all of the images.

1101

1102 To quantify the membrane potential, the TMRM assay images were analyzed as  
1103 described above using the bright field channel of each image for thresholding and  
1104 counting to calculate the mean fluorescence intensity in each bacterium. Endospores,  
1105 which exhibited a bright fluorescent signal upon TMRM staining, were excluded from  
1106 the analysis. This processing was applied to all of the acquisitions for this experiment.

1107

1108 To quantify the fluorescence of the bacteria expressing the *floT-yfp* construct, images  
1109 were analyzed as described above using the bright field channel of each image for  
1110 thresholding and counting to calculate the mean fluorescence intensity in each  
1111 bacterium.

1112

### 1113 *Statistical analysis*

1114

1115 All of the data are representative of at least three independent experiments with at  
1116 least three technical replicates. The results are expressed as the mean  $\pm$  standard  
1117 error of the mean (SEM). Statistical significance was assessed by performing the  
1118 appropriate tests (see the figure legends). All analyses were performed using  
1119 GraphPad Prism version 6. P-values <0.05 were considered significant. Asterisks

1120 indicate the level of statistical significance: \* =  $p < 0.05$ , \*\* =  $p < 0.01$ , \*\*\* =  $p < 0.001$ ,  
1121 and \*\*\*\* =  $p < 0.0001$ .  
1122



1123

1124 **References**

1125

- 1126 1 Toyofuku, M. *et al.* Environmental factors that shape biofilm formation. *Biosci*  
1127 *Biotechnol Biochem* **80**, 7-12, doi:10.1080/09168451.2015.1058701 (2016).
- 1128 2 Wenbo, Z. *et al.* Nutrient depletion in *Bacillus subtilis* biofilms triggers matrix  
1129 production. *New Journal of Physics* **16**, 015028 (2014).
- 1130 3 Flemming, H. C. *et al.* Biofilms: an emergent form of bacterial life. *Nat Rev*  
1131 *Microbiol* **14**, 563-575, doi:10.1038/nrmicro.2016.94 (2016).
- 1132 4 van Gestel, J., Vlamakis, H. & Kolter, R. Division of Labor in Biofilms: the  
1133 Ecology of Cell Differentiation. *Microbiol Spectr* **3**, MB-0002-2014,  
1134 doi:10.1128/microbiolspec.MB-0002-2014 (2015).
- 1135 5 Dragos, A. *et al.* Division of Labor during Biofilm Matrix Production. *Curr Biol*  
1136 **28**, 1903-1913 e1905, doi:10.1016/j.cub.2018.04.046 (2018).
- 1137 6 Branda, S. S., Vik, S., Friedman, L. & Kolter, R. Biofilms: the matrix revisited.  
1138 *Trends Microbiol* **13**, 20-26, doi:10.1016/j.tim.2004.11.006 (2005).
- 1139 7 Shank, E. A. & Kolter, R. Extracellular signaling and multicellularity in *Bacillus*  
1140 *subtilis*. *Curr Opin Microbiol* **14**, 741-747, doi:10.1016/j.mib.2011.09.016 (2011).
- 1141 8 Steinberg, N. & Kolodkin-Gal, I. The Matrix Reloaded: Probing the Extracellular  
1142 Matrix Synchronizes Bacterial Communities. *J Bacteriol*, doi:10.1128/JB.02516-  
1143 14 (2015).
- 1144 9 Vlamakis, H., Aguilar, C., Losick, R. & Kolter, R. Control of cell fate by the  
1145 formation of an architecturally complex bacterial community. *Genes Dev* **22**,  
1146 945-953, doi:10.1101/gad.1645008 (2008).
- 1147 10 Lopez, D., Vlamakis, H. & Kolter, R. Biofilms. *Cold Spring Harb Perspect Biol* **2**,  
1148 a000398, doi:10.1101/cshperspect.a000398 (2010).
- 1149 11 Molina-Santiago, C. *et al.* The extracellular matrix protects *Bacillus subtilis*  
1150 colonies from *Pseudomonas* invasion and modulates plant co-colonization. *Nat*  
1151 *Commun* **10**, 1919, doi:10.1038/s41467-019-09944-x (2019).
- 1152 12 Juliano, R. L. & Haskill, S. Signal transduction from the extracellular matrix. *J*  
1153 *Cell Biol* **120**, 577-585 (1993).
- 1154 13 Aharoni, D., Meiri, I., Atzmon, R., Vlodaysky, I. & Amsterdam, A. Differential  
1155 effect of components of the extracellular matrix on differentiation and apoptosis.  
1156 *Curr Biol* **7**, 43-51 (1997).
- 1157 14 Kim, S. H., Turnbull, J. & Guimond, S. Extracellular matrix and cell signalling:  
1158 the dynamic cooperation of integrin, proteoglycan and growth factor receptor. *J*  
1159 *Endocrinol* **209**, 139-151, doi:10.1530/JOE-10-0377 (2011).
- 1160 15 Cheresh, D. A. & Stupack, D. G. Regulation of angiogenesis: apoptotic cues  
1161 from the ECM. *Oncogene* **27**, 6285-6298, doi:10.1038/onc.2008.304 (2008).
- 1162 16 Kular, J. K., Basu, S. & Sharma, R. I. The extracellular matrix: Structure,  
1163 composition, age-related differences, tools for analysis and applications for  
1164 tissue engineering. *J Tissue Eng* **5**, 2041731414557112,  
1165 doi:10.1177/2041731414557112 (2014).
- 1166 17 Shi, Y. B., Li, Q., Damjanovski, S., Amano, T. & Ishizuya-Oka, A. Regulation of  
1167 apoptosis during development: input from the extracellular matrix (review). *Int J*  
1168 *Mol Med* **2**, 273-282 (1998).
- 1169 18 Frisch, S. M. & Francis, H. Disruption of epithelial cell-matrix interactions  
1170 induces apoptosis. *J Cell Biol* **124**, 619-626 (1994).
- 1171 19 Gonidakis, S. & Longo, V. D. Assessing chronological aging in bacteria.  
1172 *Methods Mol Biol* **965**, 421-437, doi:10.1007/978-1-62703-239-1\_28 (2013).
- 1173 20 Kolter, R., Siegele, D. A. & Tormo, A. The stationary phase of the bacterial life  
1174 cycle. *Annu Rev Microbiol* **47**, 855-874,  
1175 doi:10.1146/annurev.mi.47.100193.004231 (1993).



- 1176 21 Dukan, S. & Nystrom, T. Bacterial senescence: stasis results in increased and  
1177 differential oxidation of cytoplasmic proteins leading to developmental induction  
1178 of the heat shock regulon. *Genes Dev* **12**, 3431-3441 (1998).
- 1179 22 Navarro Llorens, J. M., Tormo, A. & Martinez-Garcia, E. Stationary phase in  
1180 gram-negative bacteria. *FEMS Microbiol Rev* **34**, 476-495, doi:10.1111/j.1574-  
1181 6976.2010.00213.x (2010).
- 1182 23 Hecker, M., Pane-Farre, J. & Volker, U. SigB-dependent general stress  
1183 response in *Bacillus subtilis* and related gram-positive bacteria. *Annu Rev*  
1184 *Microbiol* **61**, 215-236, doi:10.1146/annurev.micro.61.080706.093445 (2007).
- 1185 24 Reder, A., Hoper, D., Gerth, U. & Hecker, M. Contributions of individual  
1186 sigmaB-dependent general stress genes to oxidative stress resistance of  
1187 *Bacillus subtilis*. *J Bacteriol* **194**, 3601-3610, doi:10.1128/JB.00528-12 (2012).
- 1188 25 Gomez-Marroquin, M. *et al.* Role of *Bacillus subtilis* DNA Glycosylase MutM in  
1189 Counteracting Oxidatively Induced DNA Damage and in Stationary-Phase-  
1190 Associated Mutagenesis. *J Bacteriol* **197**, 1963-1971, doi:10.1128/JB.00147-15  
1191 (2015).
- 1192 26 Chan, C. M., Danchin, A., Marliere, P. & Sekowska, A. Paralogous metabolism:  
1193 S-alkyl-cysteine degradation in *Bacillus subtilis*. *Environ Microbiol* **16**, 101-117,  
1194 doi:10.1111/1462-2920.12210 (2014).
- 1195 27 Vlamakis, H., Chai, Y., Beauregard, P., Losick, R. & Kolter, R. Sticking together:  
1196 building a biofilm the *Bacillus subtilis* way. *Nat Rev Microbiol* **11**, 157-168,  
1197 doi:10.1038/nrmicro2960 (2013).
- 1198 28 Kearns, D. B., Chu, F., Branda, S. S., Kolter, R. & Losick, R. A master regulator  
1199 for biofilm formation by *Bacillus subtilis*. *Mol Microbiol* **55**, 739-749,  
1200 doi:10.1111/j.1365-2958.2004.04440.x (2005).
- 1201 29 Chu, F., Kearns, D. B., Branda, S. S., Kolter, R. & Losick, R. Targets of the  
1202 master regulator of biofilm formation in *Bacillus subtilis*. *Mol Microbiol* **59**, 1216-  
1203 1228, doi:10.1111/j.1365-2958.2005.05019.x (2006).
- 1204 30 Aguilar, C., Vlamakis, H., Guzman, A., Losick, R. & Kolter, R. KinD is a  
1205 checkpoint protein linking spore formation to extracellular-matrix production in  
1206 *Bacillus subtilis* biofilms. *MBio* **1**, doi:10.1128/mBio.00035-10 (2010).
- 1207 31 Marvasi, M., Visscher, P. T. & Casillas Martinez, L. Exopolymeric substances  
1208 (EPS) from *Bacillus subtilis*: polymers and genes encoding their synthesis.  
1209 *FEMS Microbiol Lett* **313**, 1-9, doi:10.1111/j.1574-6968.2010.02085.x (2010).
- 1210 32 Hogley, L. *et al.* BslA is a self-assembling bacterial hydrophobin that coats the  
1211 *Bacillus subtilis* biofilm. *Proc Natl Acad Sci U S A* **110**, 13600-13605,  
1212 doi:10.1073/pnas.1306390110 (2013).
- 1213 33 Romero, D., Aguilar, C., Losick, R. & Kolter, R. Amyloid fibers provide structural  
1214 integrity to *Bacillus subtilis* biofilms. *Proc Natl Acad Sci U S A* **107**, 2230-2234,  
1215 doi:10.1073/pnas.0910560107 (2010).
- 1216 34 Diehl, A. *et al.* Structural changes of TasA in biofilm formation of *Bacillus*  
1217 *subtilis*. *Proc Natl Acad Sci U S A* **115**, 3237-3242,  
1218 doi:10.1073/pnas.1718102115 (2018).
- 1219 35 Stover, A. G. & Driks, A. Secretion, localization, and antibacterial activity of  
1220 TasA, a *Bacillus subtilis* spore-associated protein. *J Bacteriol* **181**, 1664-1672  
1221 (1999).
- 1222 36 Stover, A. G. & Driks, A. Control of synthesis and secretion of the *Bacillus*  
1223 *subtilis* protein YqxM. *J Bacteriol* **181**, 7065-7069 (1999).
- 1224 37 Camara-Almiron, J., Caro-Astorga, J., de Vicente, A. & Romero, D. Beyond the  
1225 expected: the structural and functional diversity of bacterial amyloids. *Crit Rev*  
1226 *Microbiol*, 1-14, doi:10.1080/1040841X.2018.1491527 (2018).
- 1227 38 Danhorn, T. & Fuqua, C. Biofilm formation by plant-associated bacteria. *Annu*  
1228 *Rev Microbiol* **61**, 401-422, doi:10.1146/annurev.micro.61.080706.093316  
1229 (2007).

- 1230 39 Castiblanco, L. F. & Sundin, G. W. New insights on molecular regulation of  
1231 biofilm formation in plant-associated bacteria. *J Integr Plant Biol* **58**, 362-372,  
1232 doi:10.1111/jipb.12428 (2016).
- 1233 40 Zeriouh, H., de Vicente, A., Perez-Garcia, A. & Romero, D. Surfactin triggers  
1234 biofilm formation of *Bacillus subtilis* in melon phylloplane and contributes to the  
1235 biocontrol activity. *Environ Microbiol* **16**, 2196-2211, doi:10.1111/1462-  
1236 2920.12271 (2014).
- 1237 41 Lopez, D., Vlamakis, H., Losick, R. & Kolter, R. Paracrine signaling in a  
1238 bacterium. *Genes Dev* **23**, 1631-1638, doi:10.1101/gad.1813709 (2009).
- 1239 42 Perez-Garcia, A. *et al.* The powdery mildew fungus *Podosphaera fusca*  
1240 (synonym *Podosphaera xanthii*), a constant threat to cucurbits. *Mol Plant Pathol*  
1241 **10**, 153-160, doi:10.1111/j.1364-3703.2008.00527.x (2009).
- 1242 43 Nakano, M. M., Dailly, Y. P., Zuber, P. & Clark, D. P. Characterization of  
1243 anaerobic fermentative growth of *Bacillus subtilis*: identification of fermentation  
1244 end products and genes required for growth. *J Bacteriol* **179**, 6749-6755  
1245 (1997).
- 1246 44 Ongena, M. & Jacques, P. *Bacillus* lipopeptides: versatile weapons for plant  
1247 disease biocontrol. *Trends Microbiol* **16**, 115-125,  
1248 doi:10.1016/j.tim.2007.12.009 (2008).
- 1249 45 Shelburne, C. E. *et al.* The spectrum of antimicrobial activity of the bacteriocin  
1250 subtilisin A. *J Antimicrob Chemother* **59**, 297-300, doi:10.1093/jac/dkl495  
1251 (2007).
- 1252 46 Rajavel, M., Mitra, A. & Gopal, B. Role of *Bacillus subtilis* BacB in the synthesis  
1253 of bacilysin. *J Biol Chem* **284**, 31882-31892, doi:10.1074/jbc.M109.014522  
1254 (2009).
- 1255 47 Patel, P. S. *et al.* Bacillaene, a novel inhibitor of procaryotic protein synthesis  
1256 produced by *Bacillus subtilis*: production, taxonomy, isolation, physico-chemical  
1257 characterization and biological activity. *J Antibiot (Tokyo)* **48**, 997-1003 (1995).
- 1258 48 Niehaus, T. D. *et al.* Identification of a metabolic disposal route for the  
1259 oncometabolite S-(2-succino)cysteine in *Bacillus subtilis*. *J Biol Chem* **293**,  
1260 8255-8263, doi:10.1074/jbc.RA118.002925 (2018).
- 1261 49 Thomas, S. A., Storey, K. B., Baynes, J. W. & Frizzell, N. Tissue distribution of  
1262 S-(2-succino)cysteine (2SC), a biomarker of mitochondrial stress in obesity and  
1263 diabetes. *Obesity (Silver Spring)* **20**, 263-269, doi:10.1038/oby.2011.340  
1264 (2012).
- 1265 50 McDonnell, G. E., Wood, H., Devine, K. M. & McConnell, D. J. Genetic control  
1266 of bacterial suicide: regulation of the induction of PBSX in *Bacillus subtilis*. *J*  
1267 *Bacteriol* **176**, 5820-5830 (1994).
- 1268 51 Toyofuku, M. *et al.* Prophage-triggered membrane vesicle formation through  
1269 peptidoglycan damage in *Bacillus subtilis*. *Nat Commun* **8**, 481,  
1270 doi:10.1038/s41467-017-00492-w (2017).
- 1271 52 Nystrom, T. Stationary-phase physiology. *Annu Rev Microbiol* **58**, 161-181,  
1272 doi:10.1146/annurev.micro.58.030603.123818 (2004).
- 1273 53 Chen, Y., Gozzi, K., Yan, F. & Chai, Y. Acetic Acid Acts as a Volatile Signal To  
1274 Stimulate Bacterial Biofilm Formation. *MBio* **6**, e00392,  
1275 doi:10.1128/mBio.00392-15 (2015).
- 1276 54 Thomas, V. C. *et al.* A central role for carbon-overflow pathways in the  
1277 modulation of bacterial cell death. *PLoS Pathog* **10**, e1004205,  
1278 doi:10.1371/journal.ppat.1004205 (2014).
- 1279 55 Xiao, Z. & Xu, P. Acetoin metabolism in bacteria. *Crit Rev Microbiol* **33**, 127-  
1280 140, doi:10.1080/10408410701364604 (2007).
- 1281 56 Lewis, K. Programmed death in bacteria. *Microbiol Mol Biol Rev* **64**, 503-514  
1282 (2000).
- 1283 57 Bayles, K. W. Bacterial programmed cell death: making sense of a paradox. *Nat*  
1284 *Rev Microbiol* **12**, 63-69, doi:10.1038/nrmicro3136 (2014).

- 1285 58 Peeters, S. H. & de Jonge, M. I. For the greater good: Programmed cell death  
1286 in bacterial communities. *Microbiol Res* **207**, 161-169,  
1287 doi:10.1016/j.micres.2017.11.016 (2018).
- 1288 59 Redza-Dutordoir, M. & Averill-Bates, D. A. Activation of apoptosis signalling  
1289 pathways by reactive oxygen species. *Biochim Biophys Acta* **1863**, 2977-2992,  
1290 doi:10.1016/j.bbamcr.2016.09.012 (2016).
- 1291 60 Gross, A. *et al.* Biochemical and genetic analysis of the mitochondrial response  
1292 of yeast to BAX and BCL-X(L). *Mol Cell Biol* **20**, 3125-3136 (2000).
- 1293 61 Giovannini, C. *et al.* Mitochondria hyperpolarization is an early event in oxidized  
1294 low-density lipoprotein-induced apoptosis in Caco-2 intestinal cells. *FEBS Lett*  
1295 **523**, 200-206 (2002).
- 1296 62 Perry, S. W. *et al.* HIV-1 transactivator of transcription protein induces  
1297 mitochondrial hyperpolarization and synaptic stress leading to apoptosis. *J*  
1298 *Immunol* **174**, 4333-4344 (2005).
- 1299 63 Gaschler, M. M. & Stockwell, B. R. Lipid peroxidation in cell death. *Biochem*  
1300 *Biophys Res Commun* **482**, 419-425, doi:10.1016/j.bbrc.2016.10.086 (2017).
- 1301 64 Wong-Ekkabut, J. *et al.* Effect of lipid peroxidation on the properties of lipid  
1302 bilayers: a molecular dynamics study. *Biophys J* **93**, 4225-4236,  
1303 doi:10.1529/biophysj.107.112565 (2007).
- 1304 65 Bindoli, A., Cavallini, L. & Jocelyn, P. Mitochondrial lipid peroxidation by  
1305 cumene hydroperoxide and its prevention by succinate. *Biochim Biophys Acta*  
1306 **681**, 496-503 (1982).
- 1307 66 Heimburg, T. & Marsh, D. in *Biological Membranes* (eds Kenneth M. Merz Jr &  
1308 Benoît Roux) (Birkhäuser Boston, 1996).
- 1309 67 van de Vossenbergh, J. L., Driessen, A. J., da Costa, M. S. & Konings, W. N.  
1310 Homeostasis of the membrane proton permeability in *Bacillus subtilis* grown at  
1311 different temperatures. *Biochim Biophys Acta* **1419**, 97-104 (1999).
- 1312 68 Rossignol, M., Thomas, P. & Grignon, C. Proton permeability of liposomes from  
1313 natural phospholipid mixtures. *Biochim Biophys Acta* **684**, 195-199 (1982).
- 1314 69 Bach, J. N. & Bramkamp, M. Flotillins functionally organize the bacterial  
1315 membrane. *Mol Microbiol* **88**, 1205-1217, doi:10.1111/mmi.12252 (2013).
- 1316 70 Schneider, J. *et al.* Spatio-temporal remodeling of functional membrane  
1317 microdomains organizes the signaling networks of a bacterium. *PLoS Genet* **11**,  
1318 e1005140, doi:10.1371/journal.pgen.1005140 (2015).
- 1319 71 Yepes, A. *et al.* The biofilm formation defect of a *Bacillus subtilis* flotillin-  
1320 defective mutant involves the protease FtsH. *Mol Microbiol* **86**, 457-471,  
1321 doi:10.1111/j.1365-2958.2012.08205.x (2012).
- 1322 72 Mielich-Suss, B., Schneider, J. & Lopez, D. Overproduction of flotillin influences  
1323 cell differentiation and shape in *Bacillus subtilis*. *MBio* **4**, e00719-00713,  
1324 doi:10.1128/mBio.00719-13 (2013).
- 1325 73 Lopez, D. & Kolter, R. Functional microdomains in bacterial membranes. *Genes*  
1326 *Dev* **24**, 1893-1902, doi:10.1101/gad.1945010 (2010).
- 1327 74 Brown, D. A. Lipid rafts, detergent-resistant membranes, and raft targeting  
1328 signals. *Physiology (Bethesda)* **21**, 430-439, doi:10.1152/physiol.00032.2006  
1329 (2006).
- 1330 75 Tjalsma, H., Bolhuis, A., Jongbloed, J. D., Bron, S. & van Dijl, J. M. Signal  
1331 peptide-dependent protein transport in *Bacillus subtilis*: a genome-based survey  
1332 of the secretome. *Microbiol Mol Biol Rev* **64**, 515-547 (2000).
- 1333 76 Romero, D., Vlamakis, H., Losick, R. & Kolter, R. An accessory protein required  
1334 for anchoring and assembly of amyloid fibres in *B. subtilis* biofilms. *Mol*  
1335 *Microbiol* **80**, 1155-1168, doi:10.1111/j.1365-2958.2011.07653.x (2011).
- 1336 77 Tjalsma, H. *et al.* Conserved serine and histidine residues are critical for activity  
1337 of the ER-type signal peptidase SipW of *Bacillus subtilis*. *J Biol Chem* **275**,  
1338 25102-25108, doi:10.1074/jbc.M002676200 (2000).

- 1339 78 Murakami, C. *et al.* pH neutralization protects against reduction in replicative  
1340 lifespan following chronological aging in yeast. *Cell Cycle* **11**, 3087-3096,  
1341 doi:10.4161/cc.21465 (2012).
- 1342 79 Wang, C. & Youle, R. J. The role of mitochondria in apoptosis\*. *Annu Rev*  
1343 *Genet* **43**, 95-118, doi:10.1146/annurev-genet-102108-134850 (2009).
- 1344 80 Cao, J. *et al.* Curcumin induces apoptosis through mitochondrial  
1345 hyperpolarization and mtDNA damage in human hepatoma G2 cells. *Free*  
1346 *Radic Biol Med* **43**, 968-975, doi:10.1016/j.freeradbiomed.2007.06.006 (2007).
- 1347 81 Shi, C. *et al.* Antimicrobial Activity and Possible Mechanism of Action of Citral  
1348 against *Cronobacter sakazakii*. *PLoS One* **11**, e0159006,  
1349 doi:10.1371/journal.pone.0159006 (2016).
- 1350 82 Hicks, D. A., Nalivaeva, N. N. & Turner, A. J. Lipid rafts and Alzheimer's  
1351 disease: protein-lipid interactions and perturbation of signaling. *Front Physiol* **3**,  
1352 189, doi:10.3389/fphys.2012.00189 (2012).
- 1353 83 Malishev, R., Abbasi, R., Jelinek, R. & Chai, L. Bacterial Model Membranes  
1354 Reshape Fibrillation of a Functional Amyloid Protein. *Biochemistry* **57**, 5230-  
1355 5238, doi:10.1021/acs.biochem.8b00002 (2018).
- 1356 84 Chai, L. *et al.* The bacterial extracellular matrix protein TapA is a two-domain  
1357 partially disordered protein. *Chembiochem*, doi:10.1002/cbic.201800634  
1358 (2018).
- 1359 85 Wright, P. E. & Dyson, H. J. Intrinsically disordered proteins in cellular signalling  
1360 and regulation. *Nat Rev Mol Cell Biol* **16**, 18-29, doi:10.1038/nrm3920 (2015).
- 1361 86 Dunker, A. K., Cortese, M. S., Romero, P., Iakoucheva, L. M. & Uversky, V. N.  
1362 Flexible nets. The roles of intrinsic disorder in protein interaction networks.  
1363 *FEBS J* **272**, 5129-5148, doi:10.1111/j.1742-4658.2005.04948.x (2005).
- 1364 87 Arnaouteli, S., MacPhee, C. E. & Stanley-Wall, N. R. Just in case it rains:  
1365 building a hydrophobic biofilm the *Bacillus subtilis* way. *Curr Opin Microbiol* **34**,  
1366 7-12, doi:10.1016/j.mib.2016.07.012 (2016).
- 1367 88 Fink, R. C. *et al.* Transcriptional responses of *Escherichia coli* K-12 and  
1368 O157:H7 associated with lettuce leaves. *Appl Environ Microbiol* **78**, 1752-1764,  
1369 doi:10.1128/AEM.07454-11 (2012).
- 1370 89 Carter, M. Q., Louie, J. W., Feng, D., Zhong, W. & Brandl, M. T. Curli fimbriae  
1371 are conditionally required in *Escherichia coli* O157:H7 for initial attachment and  
1372 biofilm formation. *Food Microbiol* **57**, 81-89, doi:10.1016/j.fm.2016.01.006  
1373 (2016).
- 1374 90 Lakshmanan, V. *et al.* Microbe-associated molecular patterns-triggered root  
1375 responses mediate beneficial rhizobacterial recruitment in *Arabidopsis*. *Plant*  
1376 *Physiol* **160**, 1642-1661, doi:10.1104/pp.112.200386 (2012).
- 1377 91 Choudhary, D. K. & Johri, B. N. Interactions of *Bacillus* spp. and plants--with  
1378 special reference to induced systemic resistance (ISR). *Microbiol Res* **164**, 493-  
1379 513, doi:10.1016/j.micres.2008.08.007 (2009).
- 1380 92 Ping, L. & Boland, W. Signals from the underground: bacterial volatiles promote  
1381 growth in *Arabidopsis*. *Trends Plant Sci* **9**, 263-266,  
1382 doi:10.1016/j.tplants.2004.04.008 (2004).
- 1383 93 Ahimou, F., Jacques, P. & Deleu, M. Surfactin and iturin A effects on *Bacillus*  
1384 *subtilis* surface hydrophobicity. *Enzyme Microb Technol* **27**, 749-754 (2000).
- 1385 94 Doan, T., Marquis, K. A. & Rudner, D. Z. Subcellular localization of a  
1386 sporulation membrane protein is achieved through a network of interactions  
1387 along and across the septum. *Mol Microbiol* **55**, 1767-1781, doi:10.1111/j.1365-  
1388 2958.2005.04501.x (2005).
- 1389 95 Yasbin, R. E. & Young, F. E. Transduction in *Bacillus subtilis* by bacteriophage  
1390 SPP1. *J Virol* **14**, 1343-1348 (1974).
- 1391 96 Branda, S. S., Chu, F., Kearns, D. B., Losick, R. & Kolter, R. A major protein  
1392 component of the *Bacillus subtilis* biofilm matrix. *Mol Microbiol* **59**, 1229-1238,  
1393 doi:10.1111/j.1365-2958.2005.05020.x (2006).



- 1394 97 Romero, D., Rivera, M. E., Cazorla, F. M., de Vicente, A. & Perez-Garcia, A.  
1395 Effect of mycoparasitic fungi on the development of *Sphaerotheca fusca* in  
1396 melon leaves. *Mycol Res* **107**, 64-71 (2003).
- 1397 98 Schindelin, J. *et al.* Fiji: an open-source platform for biological-image analysis.  
1398 *Nat Methods* **9**, 676-682, doi:10.1038/nmeth.2019 (2012).
- 1399 99 Bellon-Gomez, D., Vela-Corcia, D., Perez-Garcia, A. & Tores, J. A. Sensitivity  
1400 of *Podosphaera xanthii* populations to anti-powdery-mildew fungicides in Spain.  
1401 *Pest Manag Sci* **71**, 1407-1413, doi:10.1002/ps.3943 (2015).
- 1402 100 Fischer, E. R., Hansen, B. T., Nair, V., Hoyt, F. H. & Dorward, D. W. Scanning  
1403 electron microscopy. *Curr Protoc Microbiol* **Chapter 2**, Unit 2B 2,  
1404 doi:10.1002/9780471729259.mc02b02s25 (2012).
- 1405 101 Birnboim, H. C. & Doly, J. A rapid alkaline extraction procedure for screening  
1406 recombinant plasmid DNA. *Nucleic Acids Res* **7**, 1513-1523 (1979).
- 1407 102 Magoc, T., Wood, D. & Salzberg, S. L. EDGE-pro: Estimated Degree of Gene  
1408 Expression in Prokaryotic Genomes. *Evol Bioinform Online* **9**, 127-136,  
1409 doi:10.4137/EBO.S11250 (2013).
- 1410 103 Tarazona, S. *et al.* Data quality aware analysis of differential expression in  
1411 RNA-seq with NOISeq R/Bioc package. *Nucleic Acids Res* **43**, e140,  
1412 doi:10.1093/nar/gkv711 (2015).
- 1413 104 Thornton, B. & Basu, C. Real-time PCR (qPCR) primer design using free online  
1414 software. *Biochemistry and Molecular Biology Education* **39**, 145-154,  
1415 doi:10.1002/bmb.20461 (2011).
- 1416 105 Leães, F. L. *et al.* Expression of essential genes for biosynthesis of  
1417 antimicrobial peptides of *Bacillus* is modulated by inactivated cells of target  
1418 microorganisms. *Research in Microbiology* **167**, 83-89,  
1419 doi:<http://dx.doi.org/10.1016/j.resmic.2015.10.005> (2016).
- 1420 106 Vargas, P., Felipe, A., Michan, C. & Gallegos, M. T. Induction of *Pseudomonas*  
1421 *syringae* pv. tomato DC3000 MexAB-OprM multidrug efflux pump by flavonoids  
1422 is mediated by the repressor PmeR. *Mol Plant Microbe Interact* **24**, 1207-1219,  
1423 doi:10.1094/MPMI-03-11-0077 (2011).
- 1424 107 Livak, K. J. & Schmittgen, T. D. Analysis of relative gene expression data using  
1425 real-time quantitative PCR and the 2- $\Delta\Delta$ CT method. *Methods* **25**, 402-408,  
1426 doi:<http://dx.doi.org/10.1006/meth.2001.1262> (2001).
- 1427 108 Pfaffl, M. W. A new mathematical model for relative quantification in real-time  
1428 RT-PCR. *Nucleic Acids Res* **29**, e45 (2001).
- 1429 109 Rotenberg, D., Thompson, T. S., German, T. L. & Willis, D. K. Methods for  
1430 effective real-time RT-PCR analysis of virus-induced gene silencing. *J Virol*  
1431 *Methods* **138**, 49-59, doi:10.1016/j.jviromet.2006.07.017 (2006).
- 1432 110 Strahl, H., Burmann, F. & Hamoen, L. W. The actin homologue MreB organizes  
1433 the bacterial cell membrane. *Nat Commun* **5**, 3442, doi:10.1038/ncomms4442  
1434 (2014).
- 1435 111 Friedlander, G., Le Grimellec, C., Giocondi, M. C. & Amiel, C. Benzyl alcohol  
1436 increases membrane fluidity and modulates cyclic AMP synthesis in intact renal  
1437 epithelial cells. *Biochim Biophys Acta* **903**, 341-348 (1987).
- 1438 112 Wu, J., Mao, X., Cai, T., Luo, J. & Wei, L. KOBAS server: a web-based platform  
1439 for automated annotation and pathway identification. *Nucleic Acids Res* **34**,  
1440 W720-724, doi:10.1093/nar/gkl167 (2006).
- 1441 112 Kolodkin-Gal, I. *et al.* D-amino acids trigger biofilm disassembly. *Science* **328**,  
1442 627- 629, doi:10.1126/science.1188628 (2010).
- 1443
- 1444
- 1445

1446 **Acknowledgments**

1447 We thank the Ultrasequencing Unit of the SCBI-UMA for RNA sequencing, Juan Felix  
1448 López Tellez at Bionand for his technical support in the electron transmission analysis,  
1449 and the flow cytometry service at Bionand. C.M.S is funded by the program Juan de la  
1450 Cierva Formación (FJCI-2015-23810). This work was supported by grants from ERC  
1451 Starting Grant (BacBio 637971) and Plan Nacional de I+D+I of Ministerio de Economía  
1452 y Competitividad (AGL2016-78662-R).

1453 **Author contributions**

1454 D.R. conceived the study.  
1455 D.R., and J.C.A. and Y.N. designed the experiments.  
1456 J.C.A. and Y.N. performed the main experimental work.  
1457 M.C.P.B. gave support to some physiological experiments and did q-RT-PCR  
1458 experiments.  
1459 C.M.S. and L.D.M. analyzed and processed the whole transcriptomes.  
1460 J.C.A. and J.P. performed and designed the confocal microscopy work and data  
1461 analysis.  
1462 D.R., J.C.A. and Y.N. wrote the manuscript.  
1463 D.R., J.C.A., C.M.S., A.V, A.P.G. and L.D.M. contributed critically to writing the final  
1464 version of the manuscript.

1465 **Competing interests**

1466 The authors declare no competing interests

1467

1468

## 1469 **Figure legends**

1470

1471 **Figure 1. The amyloid protein TasA is essential for the fitness of *Bacillus* cells on**  
1472 **the melon phylloplane.** A) The adhesion of the WT (black bars) and  $\Delta$ *tasA* (gray bars)  
1473 strains to melon leaves at 4 h and 2 days post-inoculation showed statistically  
1474 significant differences 2 days post-inoculation. Average values of three biological  
1475 replicates are shown with error bars representing the SEM. Statistical significance was  
1476 assessed via t-tests at each time-point (\*  $p < 0.05$ ). B) Electron micrographs of  
1477 inoculated plants taken 20 days post-inoculation show the WT cells (top) distributed in  
1478 small groups covered by extracellular material and the  $\Delta$ *tasA* cells (bottom) in  
1479 randomly distributed plasters of cells with no visible extracellular matrix. Scale bars =  
1480 25  $\mu$ m (left panels) and 5  $\mu$ m (right panels) C) The persistence of the  $\Delta$ *tasA* cells  
1481 (dashed line) was significantly reduced compared with that of the WT cells (solid line).  
1482 Average values of 5 biological replicates are shown with error bars representing the  
1483 SEM. Statistical significance was assessed by independent t-test at each time-point  
1484 (\*\*\*)  $p < 0.001$ ). D) The WT and  $\Delta$ *tasA* strains showed comparable biocontrol activity  
1485 against the fungal phytopathogen *Podosphaera xanthii*. D) LC-MS-MS analysis  
1486 revealed a higher fengycin level on melon leaves treated with  $\Delta$ *tasA* (right) cells  
1487 compared with that on leaves treated with WT cells (left).

1488

1489 **Figure 2. Whole-transcriptome analysis revealed major gene expression changes**  
1490 **in the  $\Delta$ *tasA* strain.** A) Voronoi plot depicting the differentially expressed genes  
1491 clustered into different regulons. The box size is proportional to the expression levels.  
1492 Induced genes are colored in green, and repressed genes are colored in red. B) Genes  
1493 related to the production of different secondary metabolites with antimicrobial activity  
1494 that were induced in the transcriptomic analysis. C) Stress-related genes that were  
1495 induced in the transcriptomic analysis.

1496

1497 **Figure 3.  $\Delta$ *tasA* cells produce larger amounts of fengycin.** A) Flow cytometry  
1498 results with cells encoding the promoter of the fengycin promoter fused to YFP show  
1499 that a higher percentage of  $\Delta$ *tasA* cells (blue) expressed YFP compared with the  
1500 percentage of YFP-expressing WT cells (red) at 48 h (top) and 72 h (bottom). B)  
1501 MALDI-MS analysis of spent medium showed a higher fengycin level in  $\Delta$ *tasA* cultures  
1502 (right) compared to that in WT cultures (left). C) Serial dilutions of spent medium after  
1503 72 h of incubation showed that the medium from  $\Delta$ *tasA* cultures retained as much



1504 antifungal activity as the medium from WT cultures. Average values of five biological  
1505 replicates are shown. Error bars represent the SEM.

1506

1507 **Figure 4.  $\Delta$ tasA cells show altered respiration rates, lower intracellular pH, and**

1508 **increased cell death.** A) Flow cytometry density plots of cells double stained with the

1509 HPF (Y axis) and CTC (X axis) dyes show that  $\Delta$ tasA cells were metabolically less

1510 active (lower proportion of cells reducing CTC) and were under oxidative stress as

1511 early as 24 h (higher proportion of HPF-stained cells). B) Measurements of intracellular

1512 pH show significant cytoplasmic acidification in the  $\Delta$ tasA cells at 72 h. Average values

1513 of four biological replicates are shown. Statistical significance was assessed by one-

1514 way ANOVA with the Tukey test (\*  $p < 0.05$ ). C) The population dynamics in  $\Delta$ tasA

1515 (dashed line) and WT colonies (solid line) grown on MSgg agar at 30 °C showed a

1516 difference of nearly one order of magnitude in the  $\Delta$ tasA colony from 48 h. Average

1517 values of three biological replicates are shown. Error bars represent the SEM.

1518 Statistical significance was assessed by the Mann-Whitney test (\*  $p < 0.05$ ). D) Left.

1519 Quantification of the proportion of dead cells treated with the BacLight LIVE/DEAD

1520 viability stain in WT and  $\Delta$ tasA colonies at different time-points revealed a higher

1521 population of dead cells in  $\Delta$ tasA colonies compared to that found in the WT colonies.

1522 Average values of three biological replicates are shown with error bars representing

1523 the SEM. For each experiment, at least three fields-of-view were measured. Statistical

1524 significance was assessed via independent t-tests at each time-point (\*\*\*\*  $p < 0.0001$ ).

1525 Right. Representative confocal microscopy images of fields corresponding to

1526 LIVE/DEAD stained WT or  $\Delta$ tasA samples at 72 h. Scale bars = 10  $\mu$ m.

1527

1528 **Figure 5. The  $\Delta$ tasA cells exhibit higher levels of DNA damage.** A) TUNEL assays

1529 (right) and CLSM analysis revealed significant DNA damage in the  $\Delta$ tasA cells

1530 compared to that in the WT cells. The cells were counterstained with DAPI DNA stain

1531 (left). Scale bars = 5  $\mu$ m. B) Quantification of the TUNEL signals in WT and  $\Delta$ tasA

1532 colonies. The results showed significant differences in the DNA damage levels in

1533  $\Delta$ tasA and WT cells after 24 and 48 h of growth. Average values of three biological

1534 replicates are shown. For each experiment, at least three fields-of-view were

1535 measured. Error bars indicate the SEM. Statistical significance was assessed via

1536 independent t-tests at each time-point (\*\*  $p < 0.01$  \*\*\*  $p < 0.001$ )

1537

1538 **Figure 6.  $\Delta$ tasA cells show altered membrane potential, higher susceptibility to**

1539 **lipid peroxidation and exhibit high membrane fluidity.** A) Left panel. A TMRM

1540 assay of WT and  $\Delta$ tasA cells, located at the top or bottom respectively in each set,

1541 showed a decrease in membrane potential in the WT cells, whereas the  $\Delta$ *tasA* cells  
1542 exhibited hyperpolarization at 48 and 72 h. Center panel. Assessment of the lipid  
1543 peroxidation levels using BODIPY 581/591 C11 reagent in WT and  $\Delta$ *tasA* cells after  
1544 treatment with 5mM CuHpx and analysis by CLSM. The ratio images represent the  
1545 ratio between the two states of the lipid peroxidation sensor: reduced channel<sub>(590-613 nm</sub>  
1546 emission)/oxidized channel<sub>(509-561nm emission)</sub>. The ratio images were pseudo-colored  
1547 depending on the reduced/oxidized ratio values. A calibration bar (from 0 to 50) is  
1548 located at the bottom of the panel. Confocal microscopy images show that CuHpx  
1549 treatment was ineffective in the WT strain at 72 h, whereas the mutant strain showed  
1550 symptoms of lipid peroxidation. Right panel. Laurdan GP analyzed via fluorescence  
1551 microscopy. The images were taken at two different emission wavelengths (gel phase,  
1552 432 to 482 nm and liquid phase, 509 to 547 nm) that correspond to the two possible  
1553 states of the Laurdan reagent depending on the lipid environment. The Laurdan GP  
1554 images represent the Laurdan GP value of each pixel (see Materials and methods).  
1555 The Laurdan GP images were pseudo-colored depending on the laurdan GP values. A  
1556 calibration bar (from 0 to 1) is located at the bottom of the set. The Laurdan GP images  
1557 show an increase in membrane fluidity (lower Laurdan GP values) in the *tasA* mutant  
1558 cells 48 and 72 h. All scale bars are equal to 5  $\mu$ m. B) Quantification of the TMRM  
1559 signal, lipid peroxidation and laurdan GP revealed statistically significant differences  
1560 between the WT and  $\Delta$ *tasA* colonies at 48 and 72 h. Average values of three biological  
1561 replicates are shown with error bars representing the SEM. For each experiment, at  
1562 least three fields-of-view were measured. Statistical significance in each experiment  
1563 was assessed via independent t-tests at each time-point (\*\*\*\*  $p < 0.0001$ , \*  $p < 0.05$ , \*\*  
1564  $p < 0.01$ ).

1565

1566 **Figure 7. The absence of TasA causes mislocalization of the flotillin-like protein**  
1567 **FloT.** A) Representative confocal microscopy images showing WT or  $\Delta$ *tasA* cells  
1568 expressing the *floT-yfp* construct at 72 hours. WT images show the typical punctate  
1569 pattern associated to FloT. That pattern is lost in  $\Delta$ *tasA* cells. B) Quantification of  
1570 fluorescence signal in WT and  $\Delta$ *tasA* samples at 48 and 72 h show significant  
1571 differences between the two strains (\*\*  $p < 0.001$  \*\*\*\*  $p < 0.0001$ ). Average values of  
1572 three biological replicates are shown with error bars representing the SEM. For each  
1573 experiment, at least three fields-of-view were measured. C) Western blot of different  
1574 membrane fractions exposed to an anti-TasA or anti-YFP antibodies. 1 = WT DRM  
1575 fraction, 2 = WT DSM fraction, 3 = WT cytosolic fraction, 4 =  $\Delta$ *tasA* DRM fraction, 5 =  
1576  $\Delta$ *tasA* DSM fraction, 6 =  $\Delta$ *tasA* cytosolic fraction. D) Top. Fluorescence microscopy of  
1577 72 h WT cells expressing *tasA-mCherry* stained with the membrane dye FM 4-64.

1578 Bottom. Fluorescence microscopy of protoplast cells expressing a *tasA-mCherry*  
1579 construct. The signal corresponding to TasA appears in the surface of protoplasts.  
1580 Scale bars = 5

1581

1582 **Figure 8. Mature TasA is required to stabilize the levels of cell death within the *B.***  
1583 ***subtilis* colony.** A) Left. Representative confocal microscopy images of fields  
1584 corresponding to LIVE/DEAD-stained WT or  $\Delta tapA$  samples at 72 h. Scale bars = 10  
1585  $\mu\text{m}$ . Right. Quantification of the proportion of dead cells in WT and  $\Delta tapA$  colonies at  
1586 72 h revealed no differences in the levels of cell death. Average values of three  
1587 biological replicates are shown with error bars representing the SEM. For each  
1588 experiment, at least three fields-of-view were measured. Statistical significance was  
1589 assessed via independent t-tests at each time-point (\*\*\*\*  $p < 0.0001$ ). B) Colony  
1590 phenotypes of WT,  $\Delta tasA$  and SiPmutant strains on MSgg agar 72 h. Scale bars = 1  
1591 cm. C) Western blot of the cell and matrix fractions of the three strains at 72 h exposed  
1592 to an anti-TasA antibody. Lanes: 1 = WT cell fraction, 2 = *tasA*<sub>native</sub> cell fraction 3 =  
1593 SiPmutant cell fraction 4 = WT matrix fraction 5 = *tasA*<sub>native</sub> matrix fraction 6 =  
1594 SiPmutant matrix fraction. D) Left. Representative confocal microscopy images of fields  
1595 corresponding to LIVE/DEAD stained WT or SiPmutant samples at 72 h. Scale bars =  
1596 10  $\mu\text{m}$ . Right. Quantification of the proportion of dead cells in WT and SiPmutant  
1597 colonies at different time points revealed higher levels of cell death in the SiPmutant  
1598 colonies. Average values of three biological replicates are shown with error bars  
1599 representing the SEM. For each experiment, at least three fields-of-view were  
1600 measured. Statistical significance was assessed via independent t-tests at each time-  
1601 point (\*\*\*\*  $p < 0.0001$ ).

1602

1603 **Figure 9. A TasA variant fails to restore biofilm formation in *tasA*-deleted cells,**  
1604 **but rescues their physiological status.** A) Colony phenotypes of the three strains on  
1605 MSgg agar 72 h. Scale bars = 1 cm. B) A western blot of the cell fractions of the  
1606 different strains at 72 h exposed to an anti-TasA antibody showed that the protein is  
1607 present in JC81. Lanes: 1 = WT, 2 =  $\Delta tasA$ , 3 = JC70 (*tasA*<sub>native</sub>) 4 = JC81 (*tasA*<sub>variant</sub>) 5  
1608 = DRM JC81 6 = DSM JC81 7 = cytosol JC81. C) The relative expression levels of  
1609 *ppsD*, *alsS*, *albE*, *bacB* and *srfAA* in JC81 are similar to those in the WT strain. (dark  
1610 gray bars =  $\Delta tasA$ , light gray bars = JC81). Average values of three biological  
1611 replicates are shown with error bars representing the SEM. D) Flow cytometry showed  
1612 that the proportion of cells transcribing from the fengycin promoter in JC81 (green  
1613 curve) was similar to that in the WT strain (red curve). Blue curve =  $\Delta tasA$ . E) Density  
1614 plots of cells double stained with the HPF (Y axis) and CTC (X axis) dyes show that

1615 JC81 behaved similarly to the WT strain. F) Intracellular pH measurements showed no  
1616 difference between the WT and JC81 strains. Average values of four biological  
1617 replicates are shown. Error bars represent the SEM. G) The population dynamics, in  
1618 terms of CFU counts, in the JC81 colonies were similar to those in the WT colonies.  
1619 Average values of four biological replicates are shown. Error bars represent the SEM.  
1620 H) Quantification of the proportion of dead cells treated with the BacLight LIVE/DEAD  
1621 viability stain in WT and JC81 colonies at different time-points. Average values of three  
1622 biological replicates are shown with error bars representing the SEM. For each  
1623 experiment, at least three fields-of-view were measured. Statistical significance was  
1624 assessed via independent t-tests at each time-point (\*\* $p < 0.001$ ). Representative  
1625 confocal microscopy images of fields corresponding to LIVE/DEAD-stained WT or  
1626 JC81 samples at 72 hours. Scale bars = 10  $\mu\text{m}$ .

1627

1628 **Figure 10. JC81 cells expressing the TasA variant are ecologically compromised**  
1629 **on the phylloplane.** A) JC81 cells showed similar adhesion to that of the WT cells on  
1630 melon leaves 4 h or 2 days post-inoculation. Average values of three biological  
1631 replicates are shown. Error bars represent the SEM. B) Electron micrographs of  
1632 samples taken 20 days post-inoculation show an intermediate colonization pattern for  
1633 JC81 compared with those of the WT and  $\Delta\text{tasA}$  null mutant strains. C) The  
1634 persistence of JC81 cells on melon leaves was reduced compared to that of the WT  
1635 cells. Average values of five biological replicates are shown. Error bars represent the  
1636 SEM. D) The JC81 strain failed to control the disease induced by the phytopathogenic  
1637 fungi *P. xanthii*. Average values of three biological replicates are shown. Error bars  
1638 represent the SEM. Statistical significance was assessed via one-way ANOVA with the  
1639 Dunnet test (\*\*\*\*  $p < 0.0001$ ).

# Fig. 1

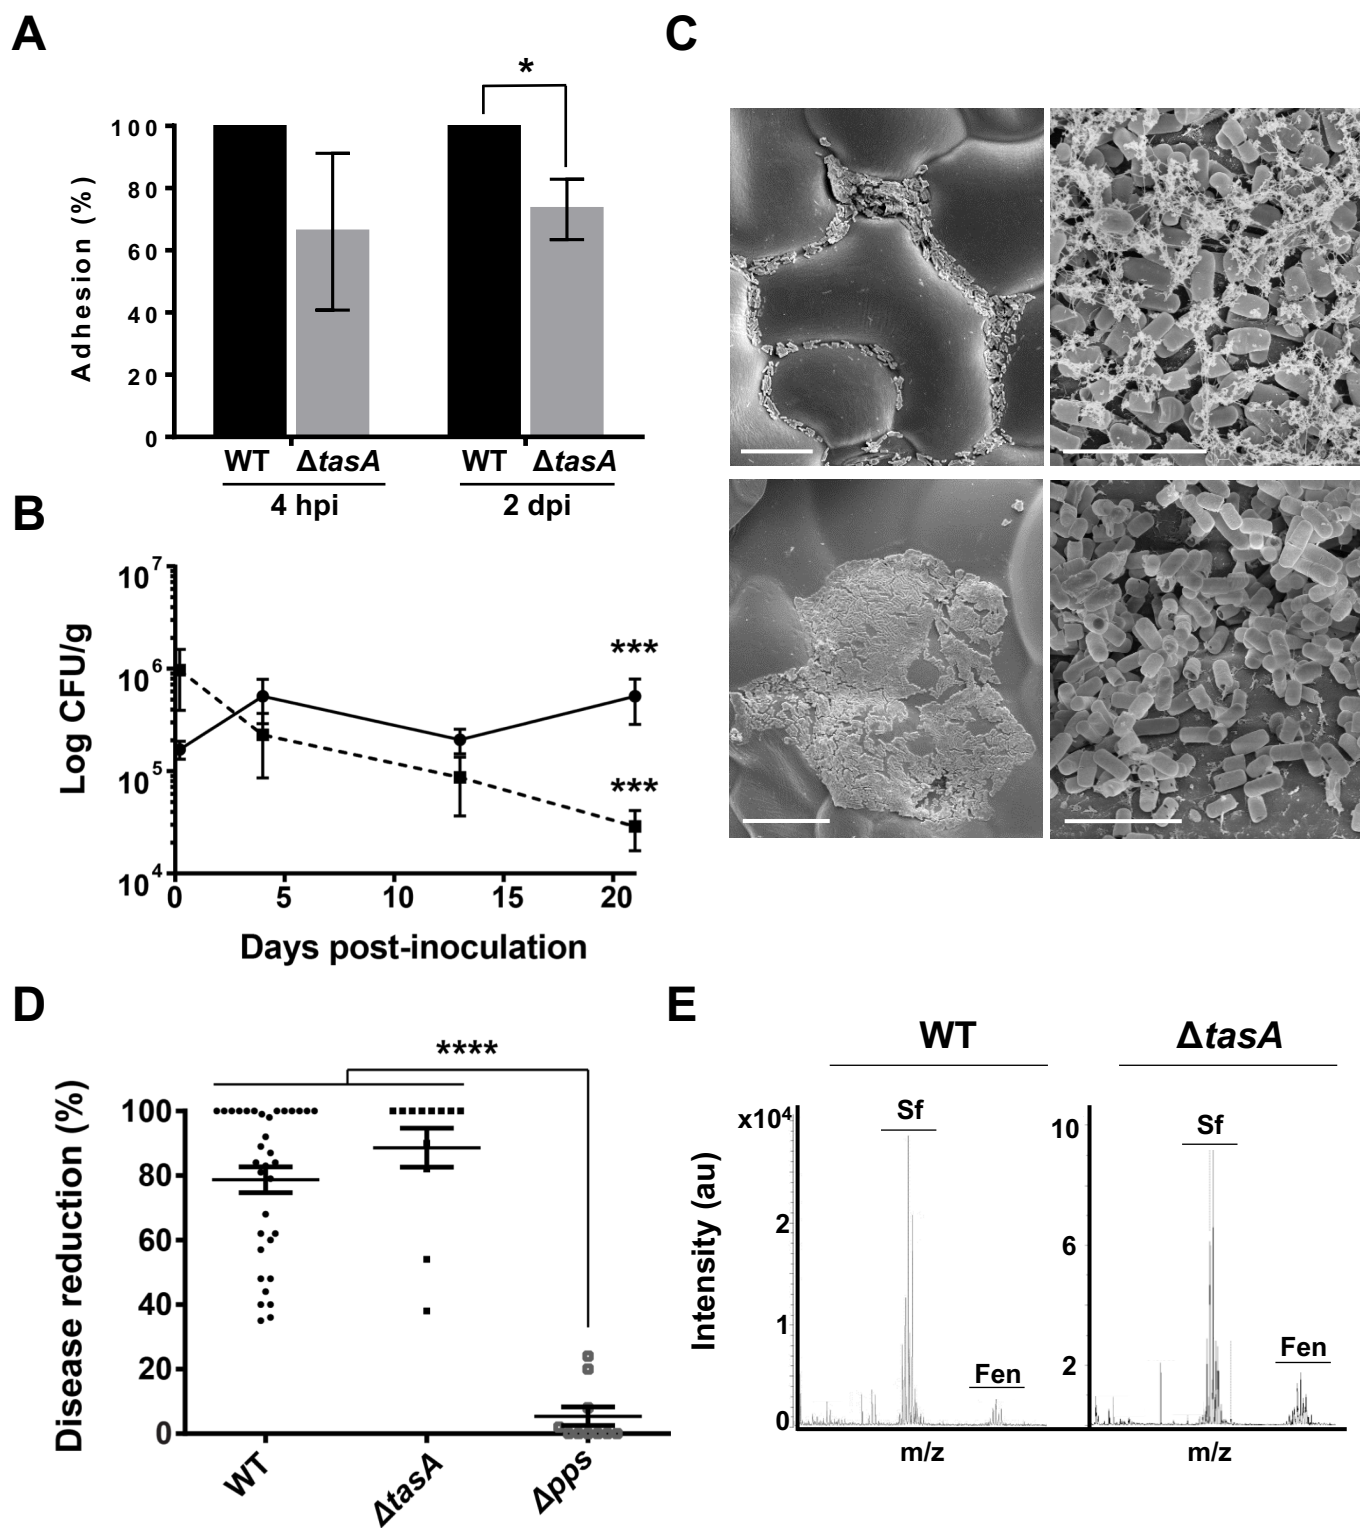



# Fig. 2

A

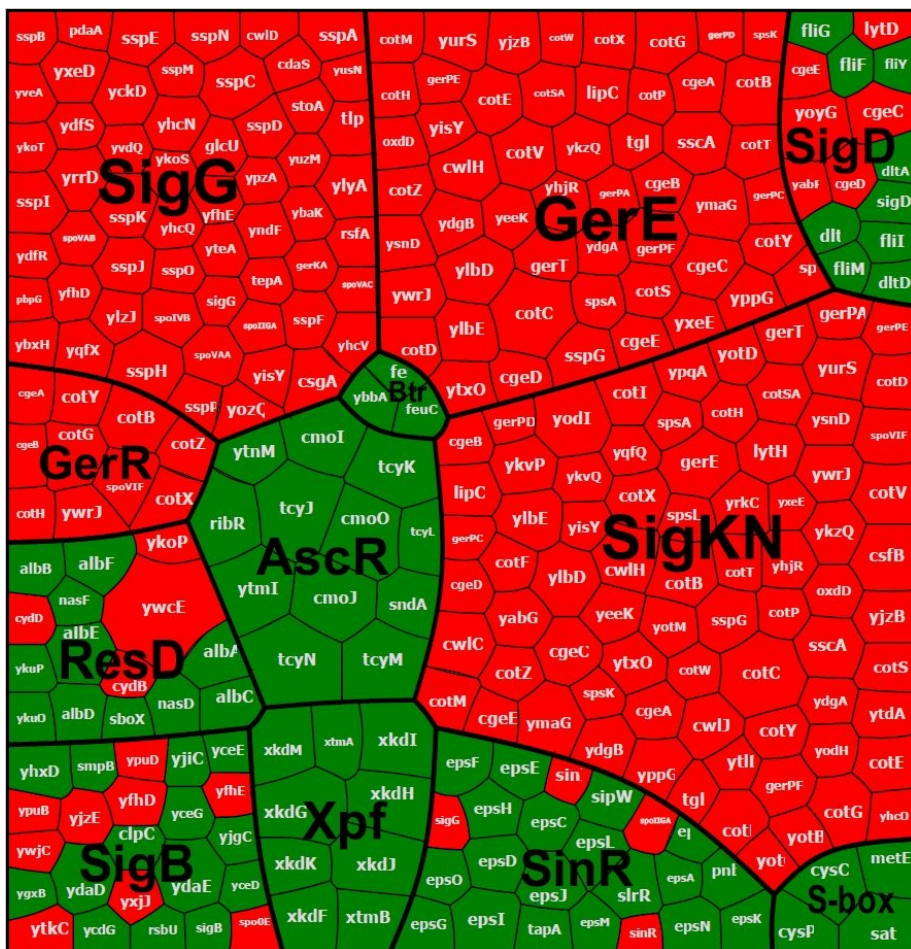

B

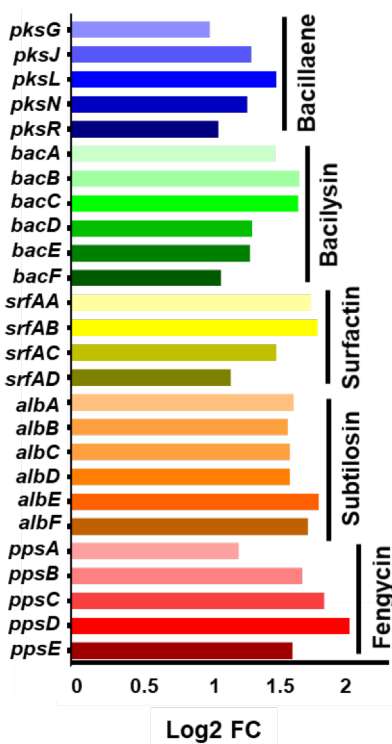

C

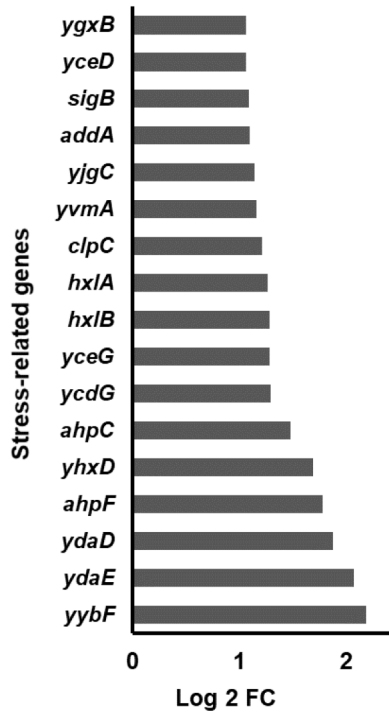

# Fig. 3

**A**

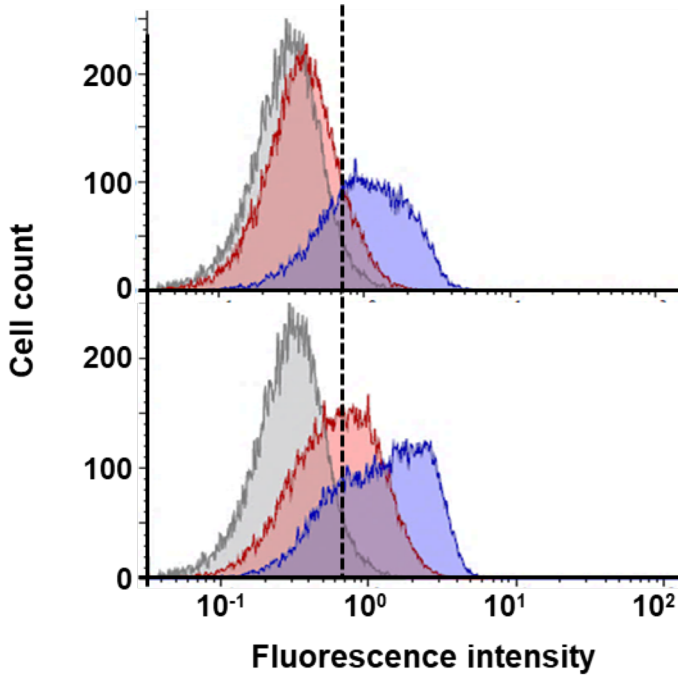

**B**

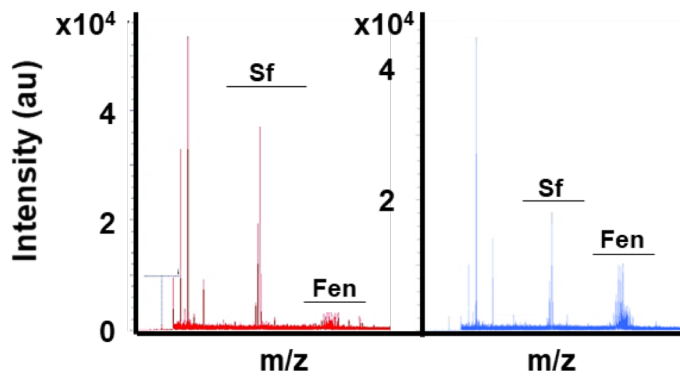

**C**

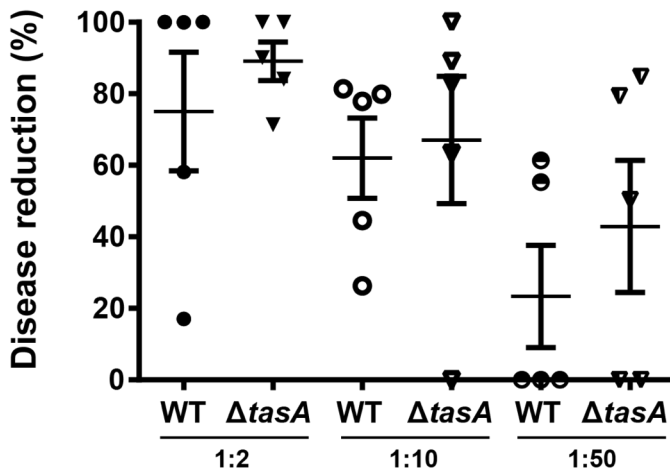



# Fig. 4

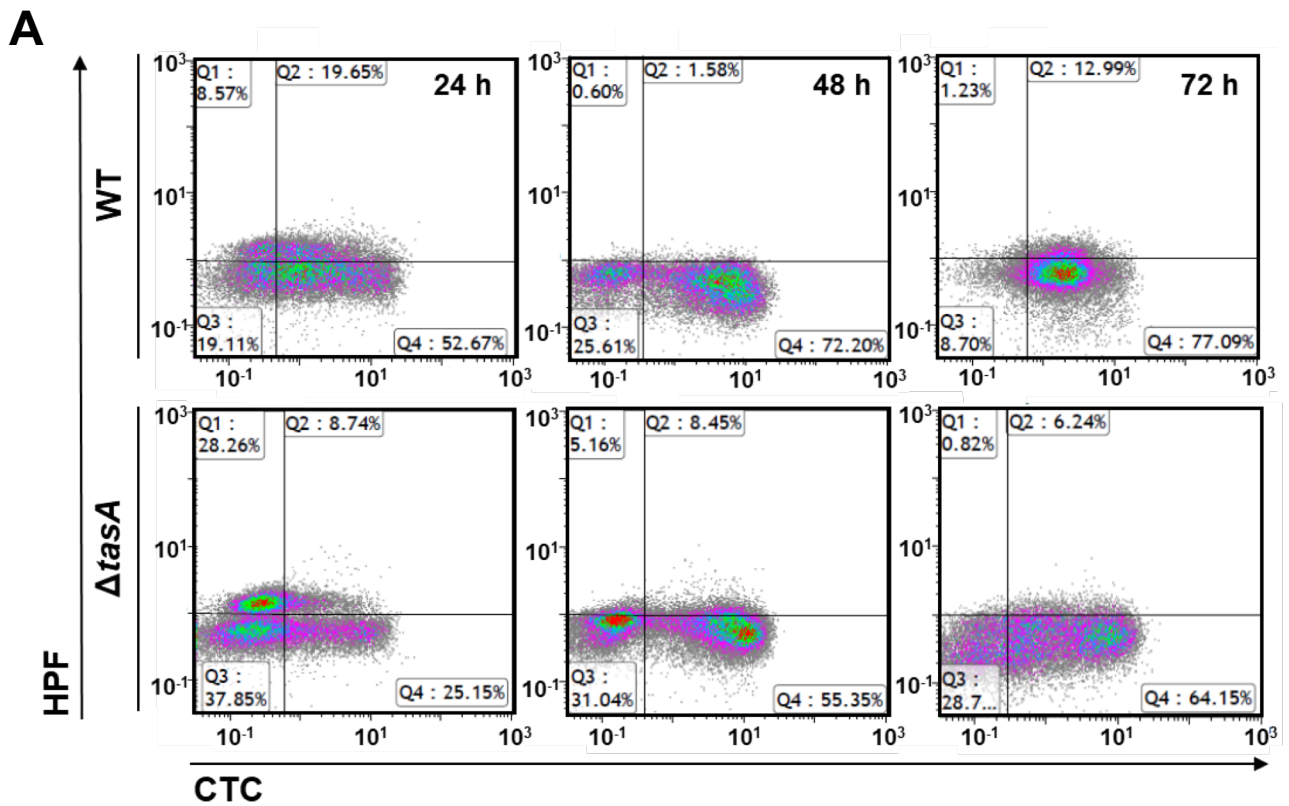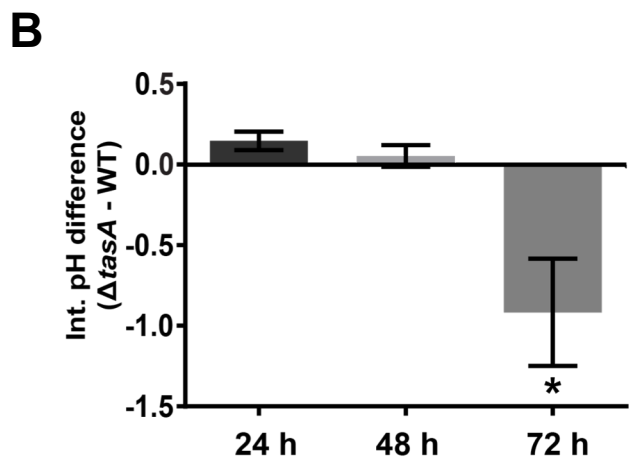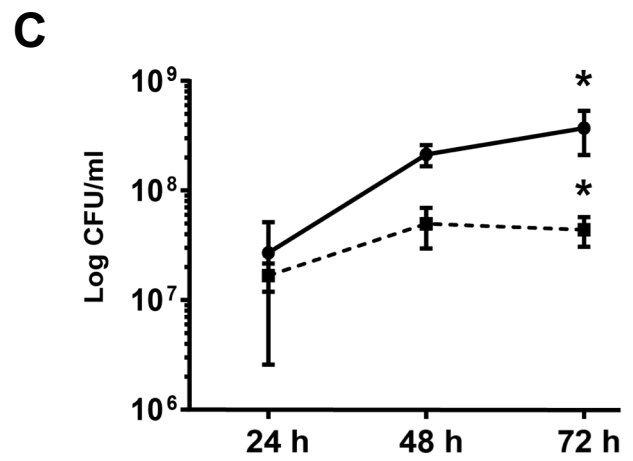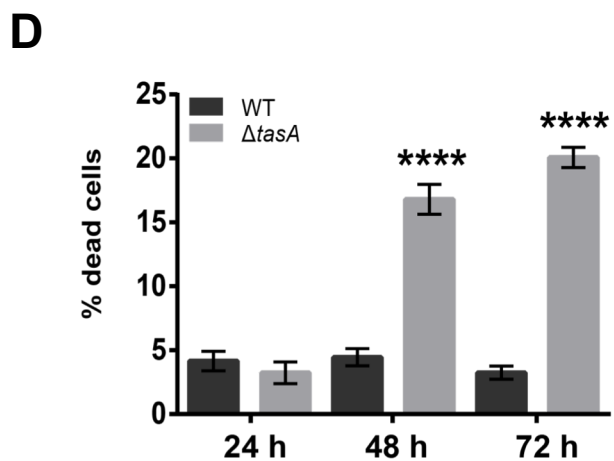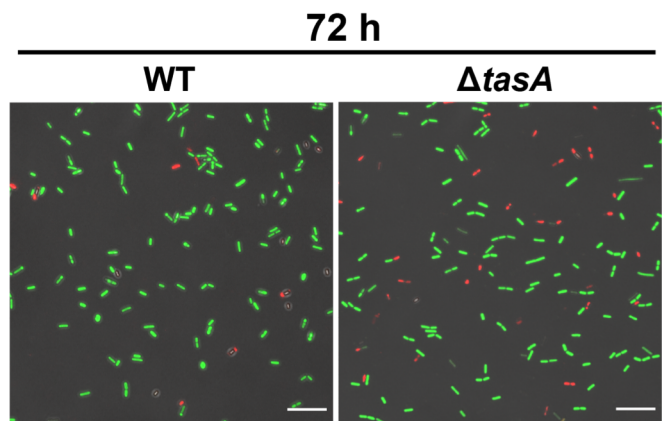

**A**

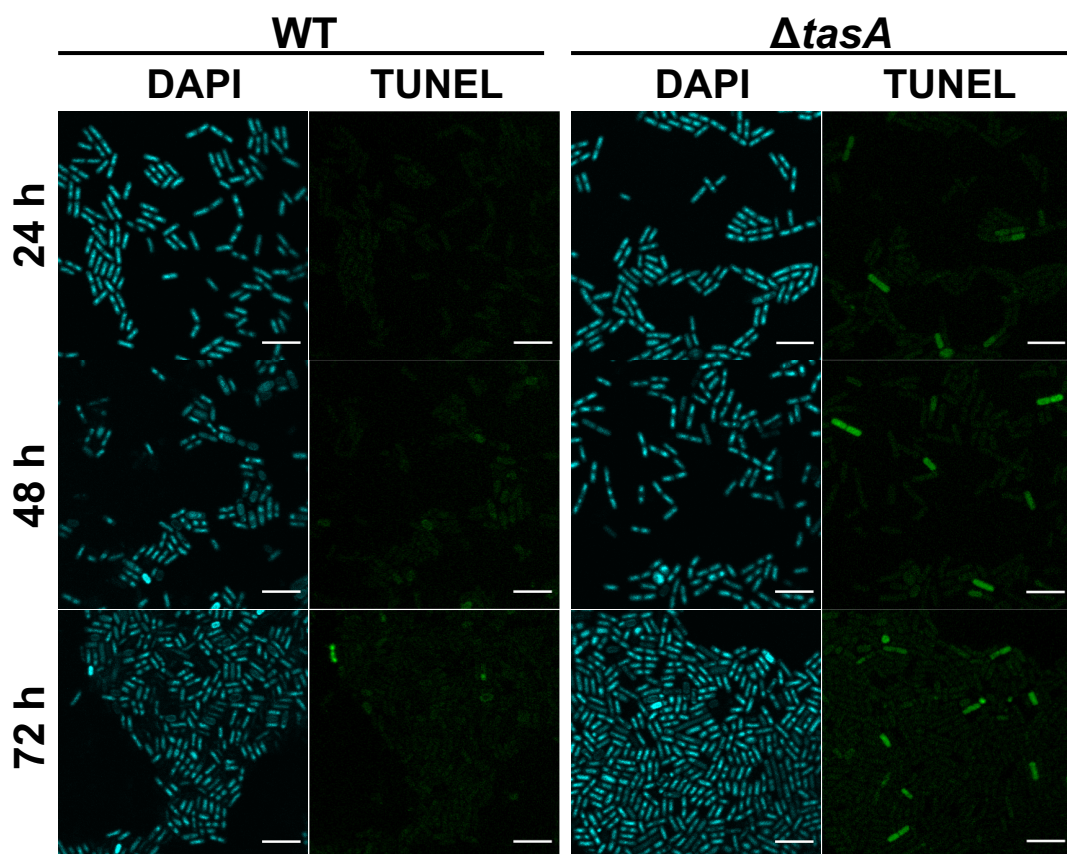

**B**

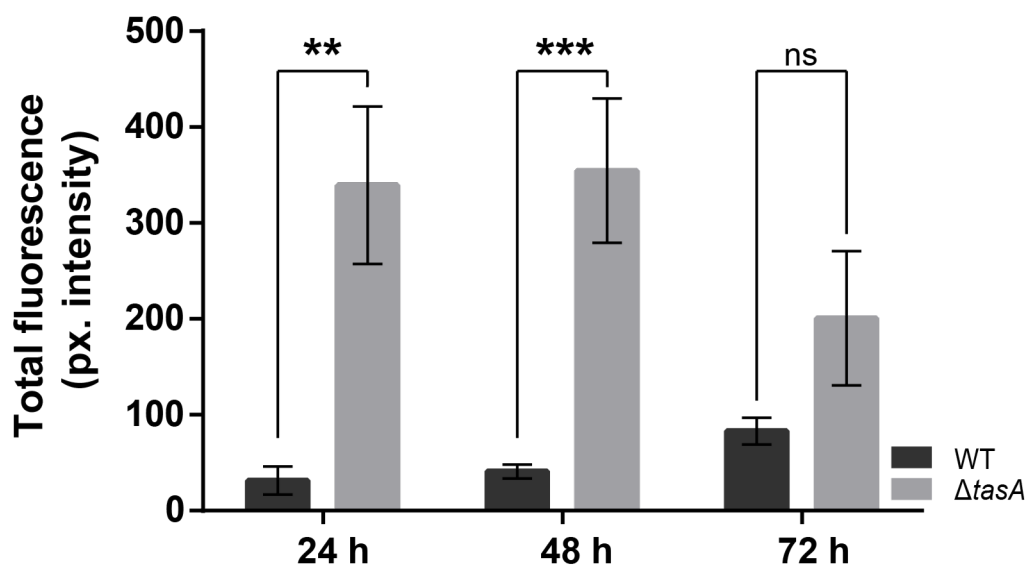

# Fig. 6

**A**

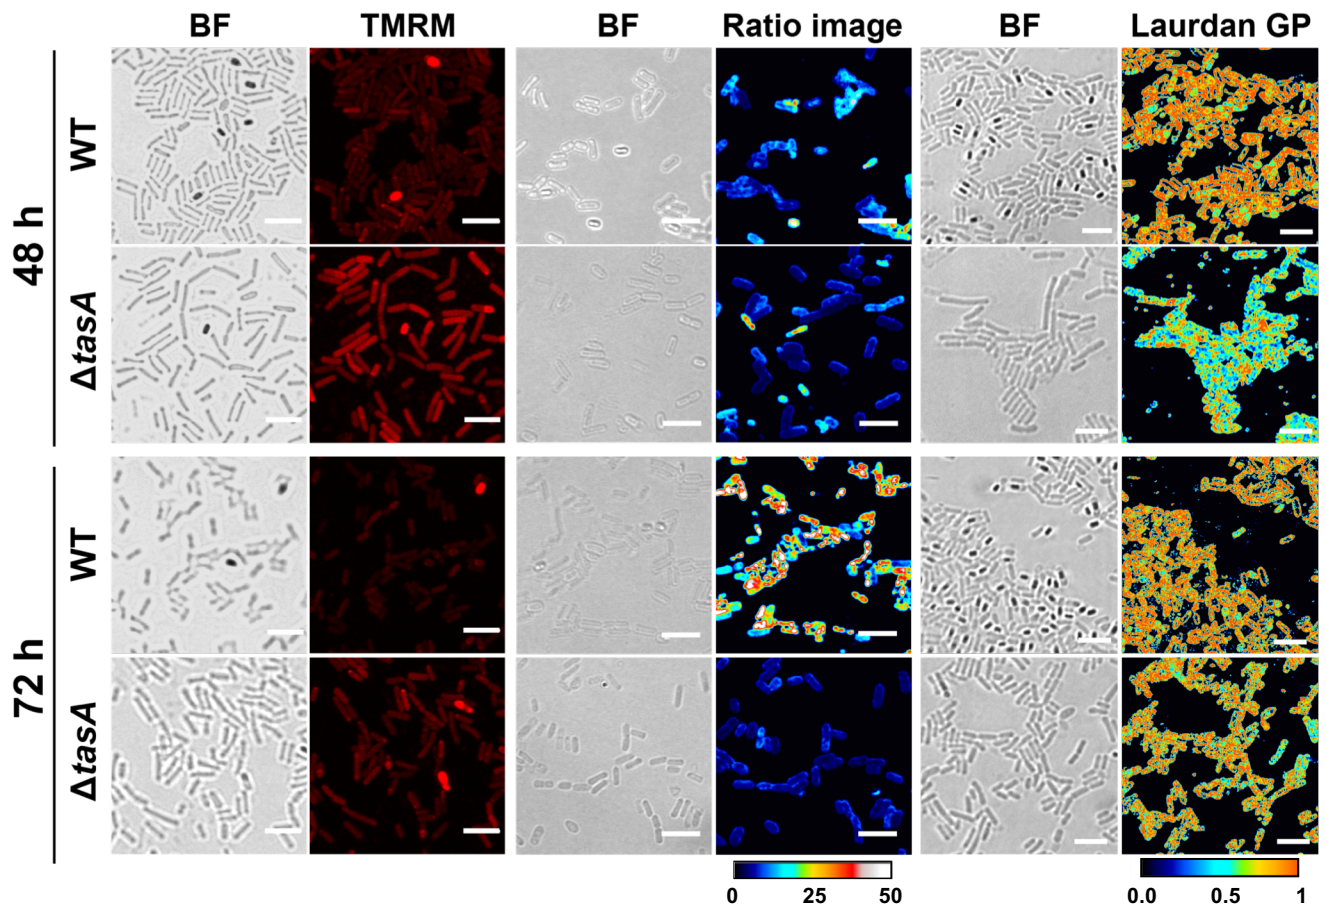

**B**

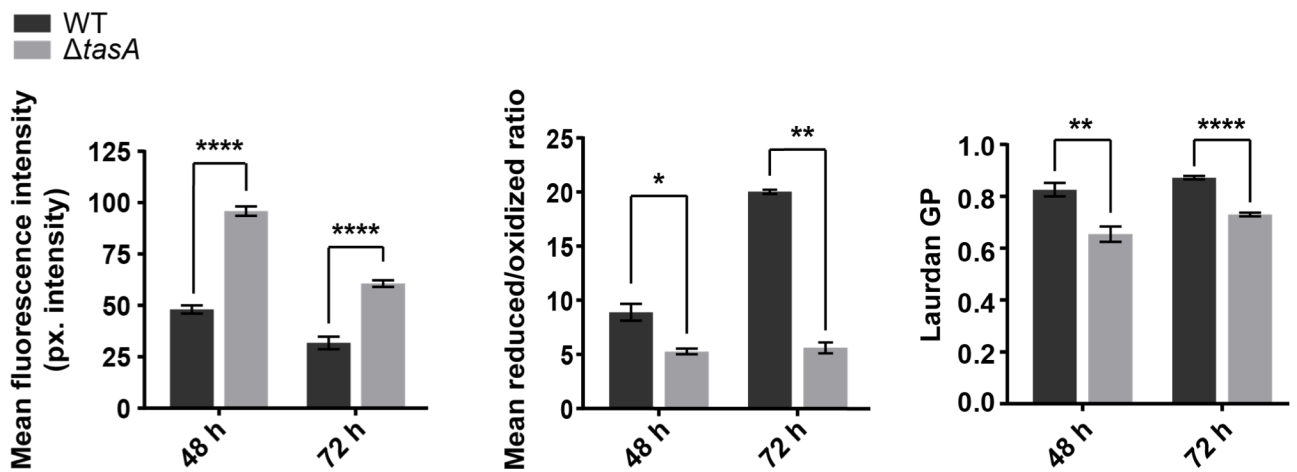

# Fig. 7

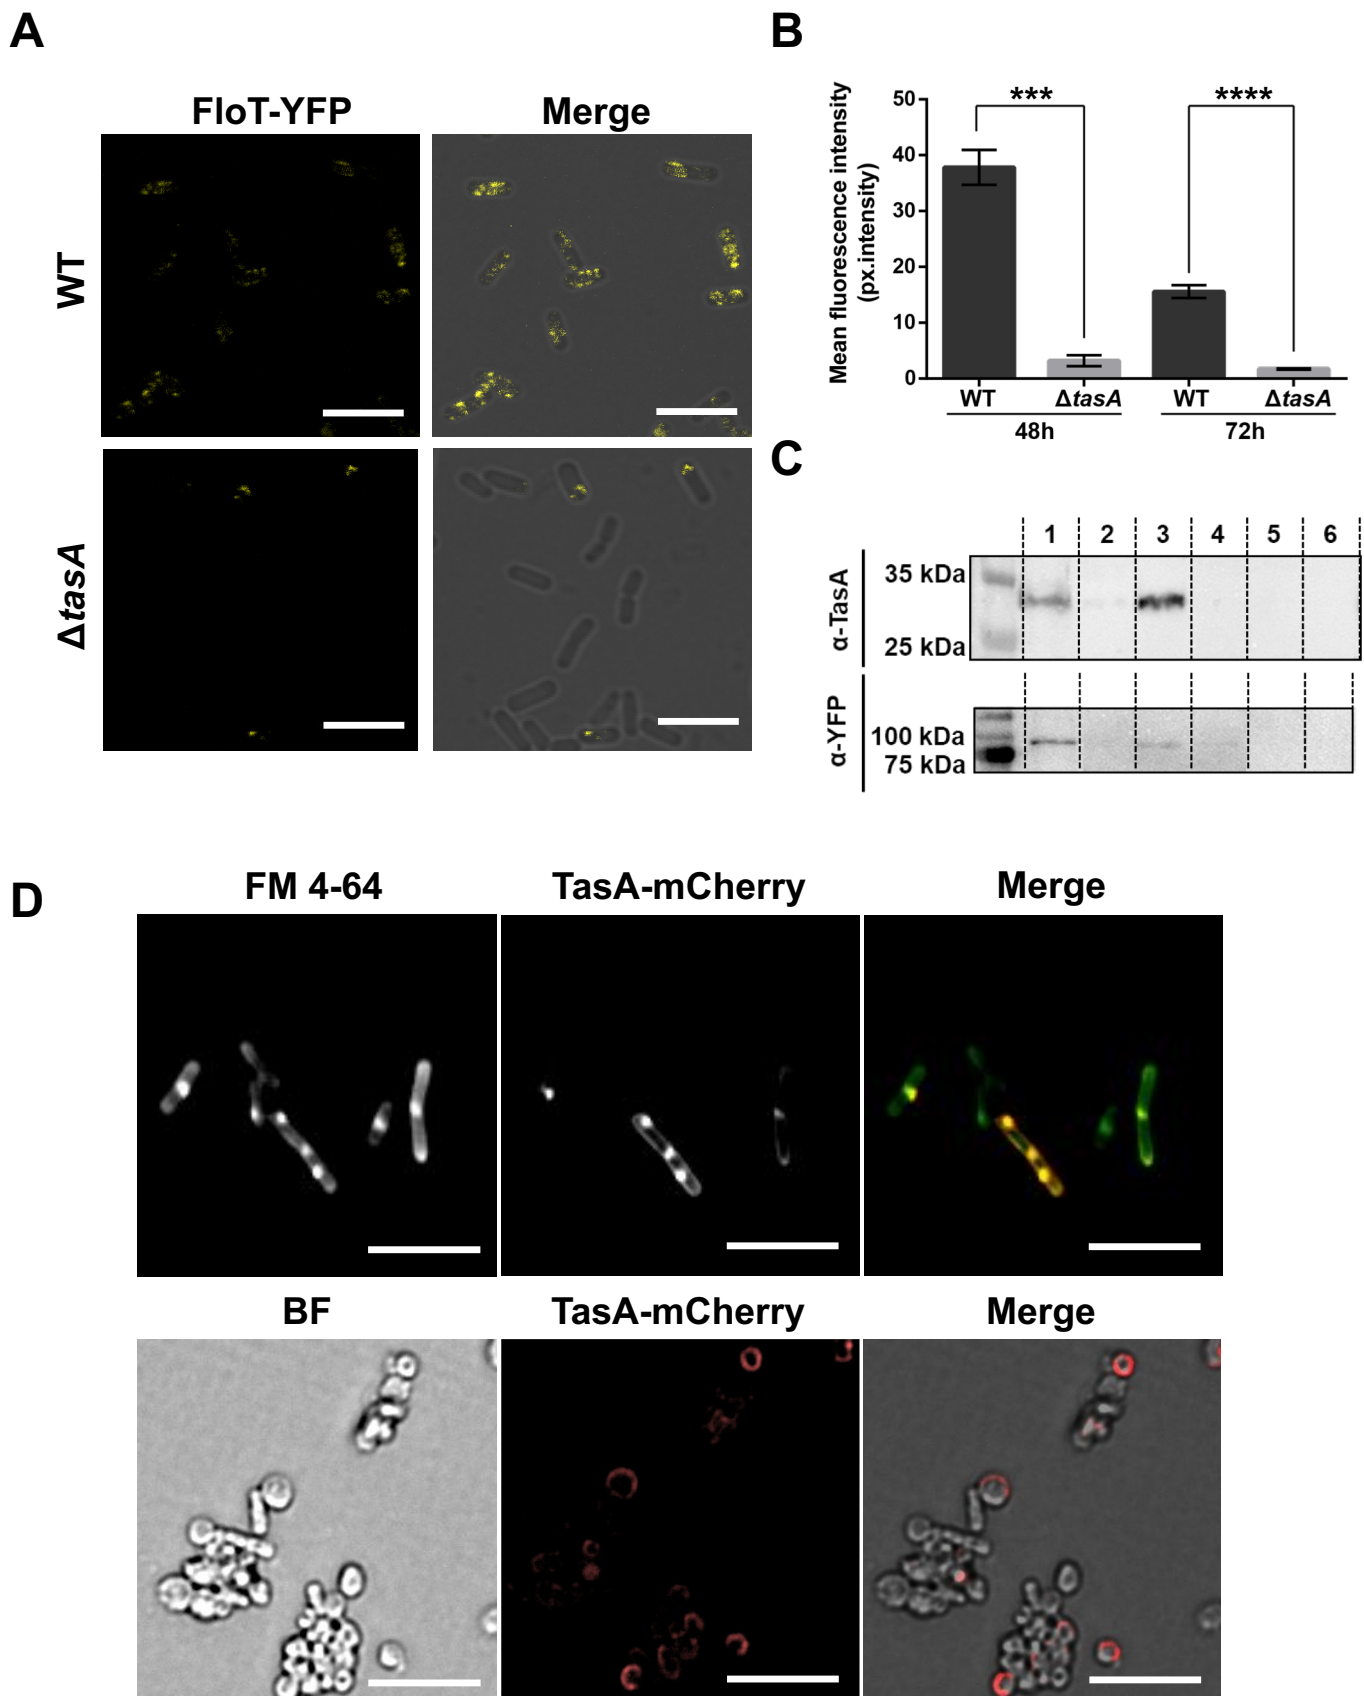



**Fig. 8**

**A**

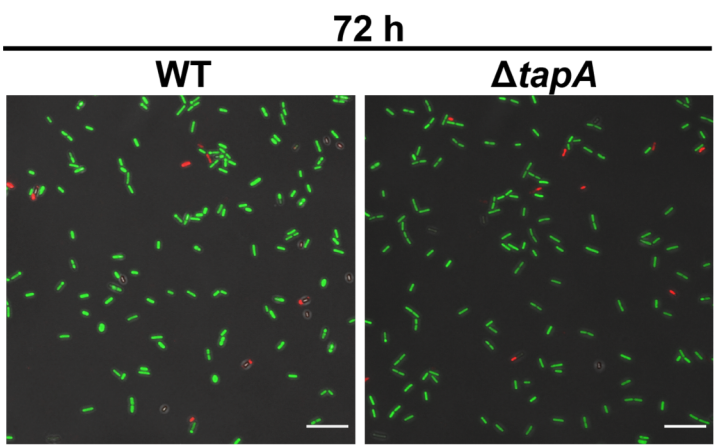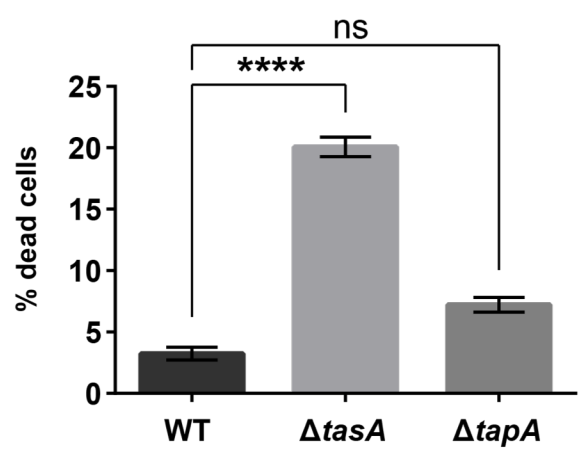

**B**

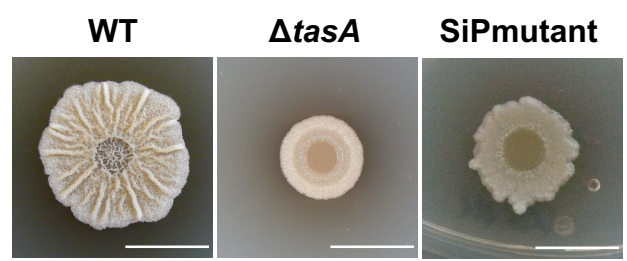

**C**

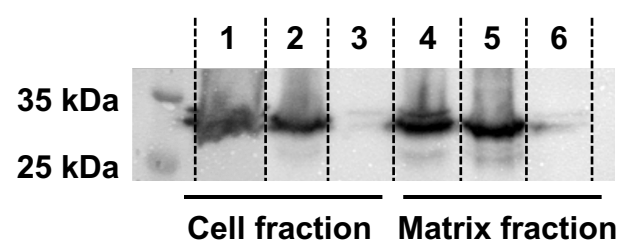

**D**

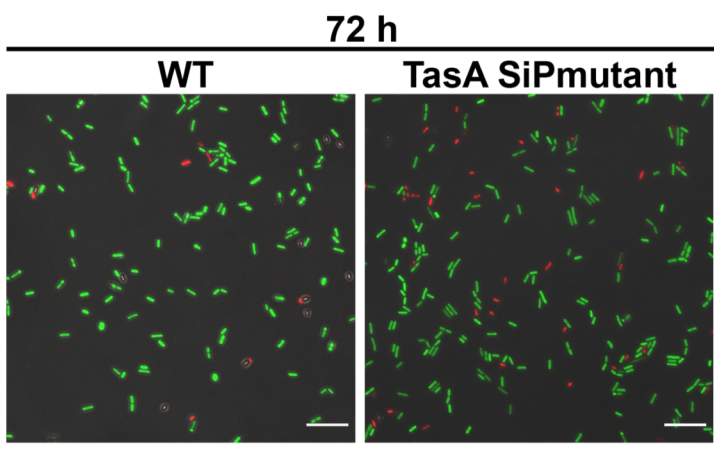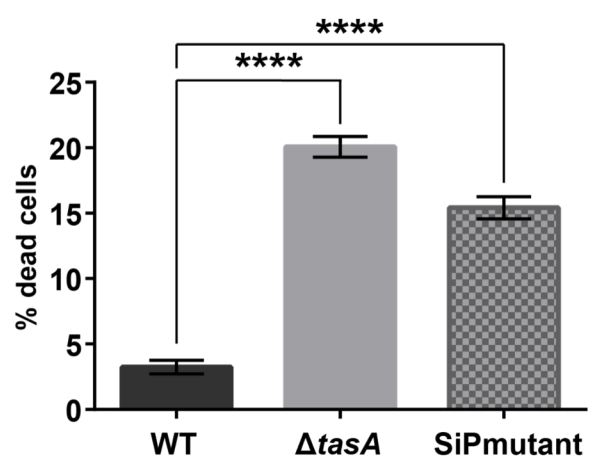

**Fig. 9****A**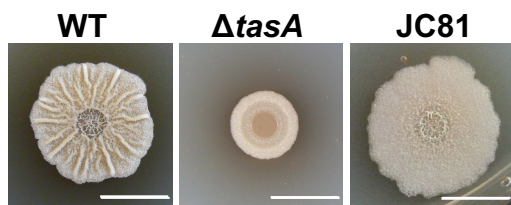**B**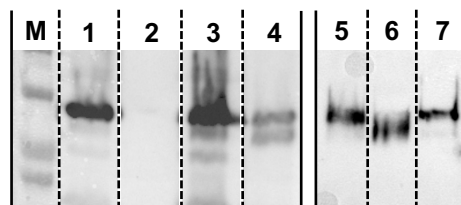**C**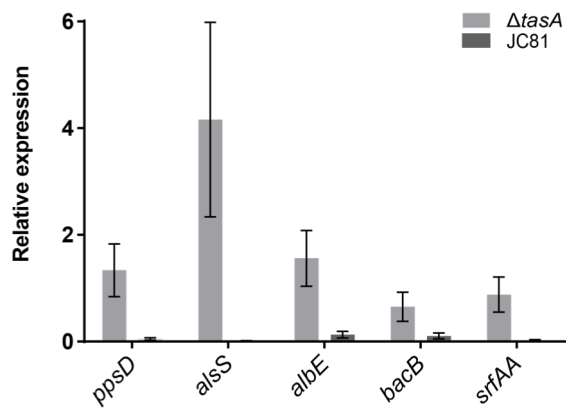**D**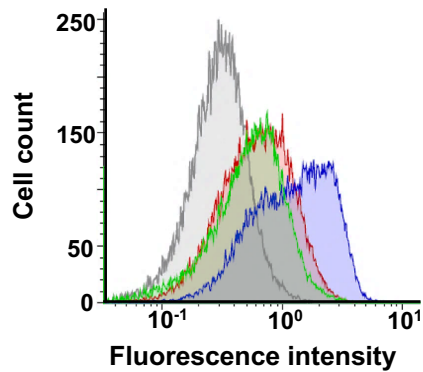**E**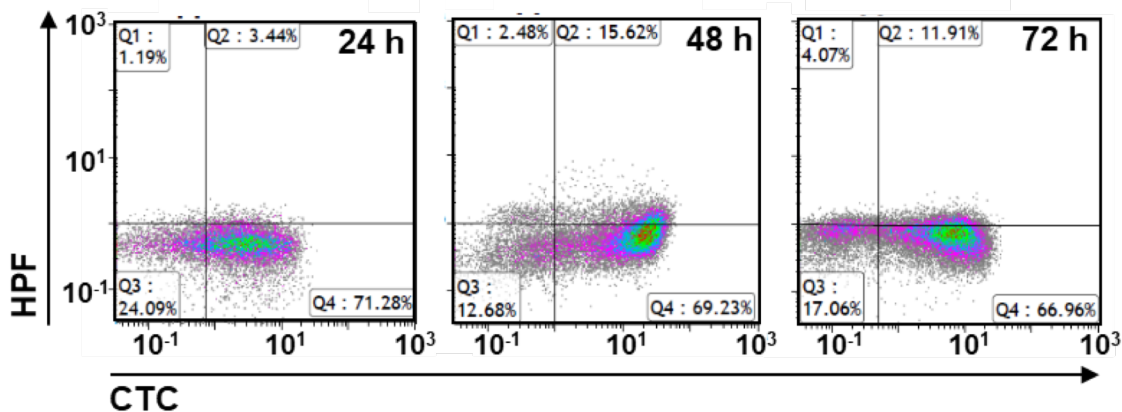**F**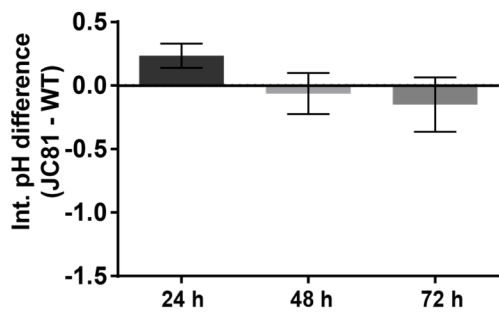**G**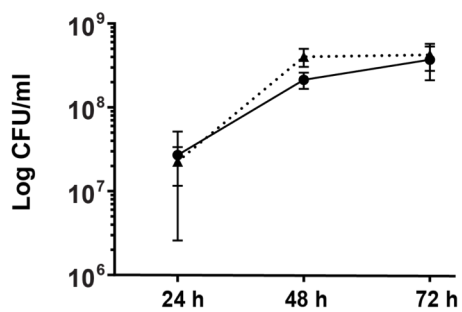**H**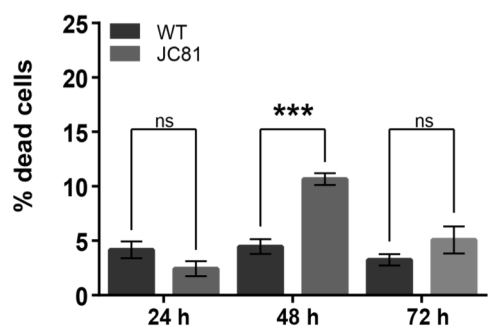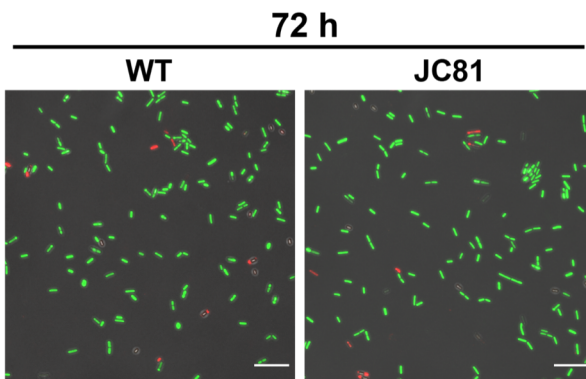

Fig. 10

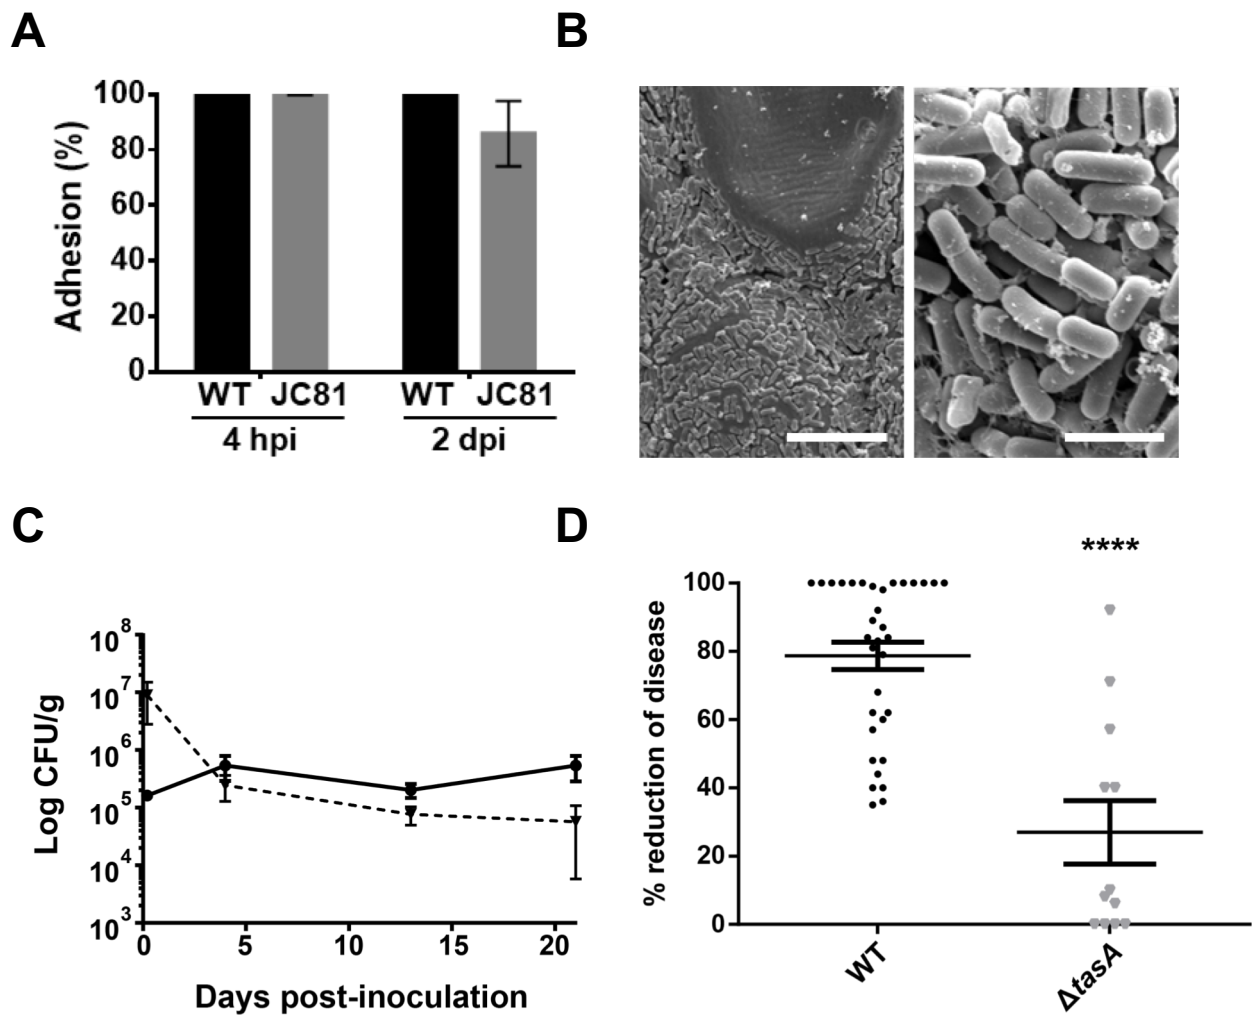

Source: https://www.biorxiv.org/content/10.1101/651356v1.full.pdf
